# Supplementary material for: Structure-activity relationships of mitochondria-targeted tetrapeptide pharmacological compounds
Source: eLife. 2022 Aug 1;11:e75531. doi: 10.7554/eLife.75531 (PMC9342957; doi:10.7554/eLife.75531)
Supplement: Figure 1—source data 1. [file elife-75531-fig1-data1.xlsx]

## Sheet: NMR Sol
Fig. 1C			raw_nmr_solv_rg	SS-31	SS-20	SPN4	SPN10			raw_nmr_solv_rmsd	SS-31	SS-20	SPN4	SPN10			Rg	SS-31	SS-20	SPN4	SPN10
NMR Solution Data				4.62884	4.60402	4.54969	4.73735				0.675939	1.06454	1.11013	1.71806			Avg	4.56906	4.69663	4.72069	4.78649
				4.53319	4.60514	4.63305	4.85502				1.19215	2.02764	1.81094	1.54588			SD	0.121024	0.131644	0.164887	0.206022
				4.47805	4.62727	4.82968	5.07884				1.24192	1.85015	1.01309	3.47763
				4.86377	4.66278	4.74642	4.66318				1.36231	1.80835	1.32249	2.49923			RMSD	SS-31	SS-20	SPN4	SPN10
				4.6551	4.81044	4.84907	4.86058				0.868931	1.6912	1.3556	2.00254			Avg	1.15757	1.62034	1.47123	2.40779
				4.58021	4.58273	4.69926	4.90092				1.26051	1.6187	1.43839	3.46762			SD	0.205726	0.349007	0.345138	0.608022
				4.48382	4.95611	4.56178	4.6346				1.40287	1.93668	2.0113	2.19378
				4.56956	4.76205	4.93304	4.95371				1.01633	1.29177	1.20736	2.32533
				4.44452	4.85521	4.48956	5.15091				1.52531	1.34478	1.38008	2.38588
				4.56969	4.61395	4.85042	4.90494				1.28682	1.16504	1.51329	1.97611
				4.84263	4.84601	4.72573	4.78005				1.30467	1.08273	1.80496	1.99156
				4.43821	4.75457	4.9617	4.49122				1.12912	1.5009	1.22265	2.1656
				4.56986	4.6172	4.86397	4.45104				0.962027	2.31119	1.10201	2.40323
				4.4038	4.73262	4.4283	4.78991				1.29019	1.94124	2.17374	1.62215
				4.57593	4.44441	4.77656	4.71484				0.981864	1.68884	1.39123	3.5966
				4.44359	4.60183	4.49494	4.4698				1.24952	1.97534	2.10701	2.77306
				4.61897	4.86891	4.66335	4.71082				1.29982	1.73318	1.56853	3.02128
				4.61227	4.80682	4.72627	4.64694				1.02894	1.66394	1.5121	2.0064
				4.47895	4.53316	4.6284	4.75987				1.11374	1.14832	1.0989	2.79049
				4.5902	4.64737	5.00267	5.17524				0.958381	1.56227	1.28088	2.1934

## Sheet: NMR Mem
Fig. 1C			raw_nmr_memb_rg	SS-31	SS-20	SPN4	SPN10			raw_nmr_memb_rmsd	SS-31	SS-20	SPN4	SPN10			Rg	SS-31	SS-20	SPN4	SPN10
NMR Membrane Data				4.71985	4.20805	4.16956	4.22737				0.62216	0.360601	0.392531	0.332662			Avg	4.63392	4.20402	4.0835	4.22704
				4.32659	4.21352	4.02404	4.22672				1.28641	0.591845	0.964482	0.408329			SD	0.180675	0.0291414	0.0824173	0.0319874
				4.74452	4.18068	4.01914	4.22933				0.727075	0.53906	1.04143	0.389242
				4.57843	4.22538	4.10122	4.18637				0.649287	0.425856	0.521743	0.439115			RMSD	SS-31	SS-20	SPN4	SPN10
				4.40898	4.20745	4.03213	4.26112				1.20149	0.685508	0.80899	0.361198			Avg	0.902787	0.547509	0.70628	0.466671
				4.77616	4.22017	4.15267	4.17298				0.747974	0.558159	0.370707	0.487698			SD	0.249072	0.0978107	0.193935	0.0890648
				4.25861	4.18696	4.14952	4.20244				1.40347	0.591596	0.800374	0.388609
				4.29985	4.18064	3.91417	4.25013				1.29024	0.389041	0.973979	0.461282
				4.78625	4.26865	4.09989	4.2213				0.640423	0.641505	0.629079	0.636672
				4.51802	4.18696	4.13136	4.24048				1.04321	0.591596	0.558447	0.504328
				4.74857	4.22071	4.01769	4.2618				0.67084	0.44693	0.740321	0.48846
				4.79298	4.17412	4.1064	4.16547				0.703673	0.506608	0.591921	0.604001
				4.72808	4.14941	3.9189	4.25187				0.849175	0.457382	0.822711	0.355567
				4.83689	4.17693	4.20772	4.21914				0.843088	0.702056	0.441968	0.481035
				4.7122	4.21233	4.16957	4.17949				0.682374	0.677158	0.718699	0.58174
				4.72109	4.23633	3.99948	4.23875				1.17986	0.468791	0.721448	0.616925
				4.67546	4.25336	4.14818	4.26928				0.78119	0.598639	0.882348	0.505262
				4.7104	4.18457	4.15111	4.25443				0.847387	0.586948	0.749621	0.414123
				4.79233	4.18068	4.07883	4.26701				1.00931	0.53906	0.554997	0.415525
				4.54309	4.21352	4.07851	4.21533				0.877093	0.591845	0.839804	0.461642

## Sheet: MD Sol
Fig. 1C			mean_ind_solv_rg	SS-31	SS-20	SPN4	SPN10			mean_ind_solv_rmsd	SS-31	SS-20	SPN4	SPN10			Rg	SS-31	SS-20	SPN4	SPN10
MD Solution Data				5.43144	5.32959	5.48191	5.1534				2.10878	2.66316	2.06792	3.37605			Avg	5.37877	5.41998	5.44127	5.22191
				5.53784	5.53276	5.46377	5.20642				2.0168	2.44191	2.16749	3.31738			SD	0.131208	0.0843572	0.0493598	0.133857
				5.49331	5.47996	5.45444	5.19212				2.50678	2.50202	2.07196	3.11334
				5.34296	5.39941	5.41999	5.40984				2.63789	2.58077	2.29502	3.10866			RMSD	SS-31	SS-20	SPN4	SPN10
				5.35269	5.42344	5.48058	5.48623				2.62998	2.54616	2.97691	3.19387			Avg	2.3934	2.59492	2.22453	3.22963
				5.44597	5.39402	5.51265	5.11176				2.08873	2.58043	2.21092	3.05108			SD	0.451901	0.154215	0.313467	0.124638
				5.50294	5.38031	5.32016	5.25056				3.39437	2.62408	2.79973	3.16989
				5.18443	5.20598	5.38154	5.33073				2.10209	3.06964	2.13901	3.31087
				5.10301	5.45072	5.45386	4.99685				2.0101	2.52741	1.98469	3.22255
				5.2432	5.4708	5.43617	5.30612				2.26533	2.53062	2.06065	3.2941
				5.43245	5.50789	5.44069	5.17849				3.14791	2.49061	1.972	3.33029
				5.47043	5.45139	5.47141	5.1706				2.19732	2.58437	1.95915	3.43661
				5.3833	5.43346	5.41931	5.09171				2.0081	2.59282	2.21351	3.06048

## Sheet: MD Mem
Fig. 1C			mean_ind_mem_rg	SS-31	SS-20	SPN4	SPN10			mean_ind_mem_rmsd	SS-31	SS-20	SPN4	SPN10			Rg	SS-31	SS-20	SPN4	SPN10
MD Membrane Data				5.76331	5.09135	5.81159	5.27173				1.56617	2.19126	1.96729	1.61057			Avg	5.78291	5.215	5.66763	5.4504
				5.83967	5.12638	5.76431	5.49191				1.72691	2.33399	1.95827	1.73231			SD	0.120956	0.104421	0.142952	0.175331
				5.72904	5.22676	5.78518	5.36236				2.29912	1.46166	1.799	2.78282
				5.99323	5.24597	5.6518	5.32092				1.43843	2.00979	1.96688	2.30233			RMSD	SS-31	SS-20	SPN4	SPN10
				5.86078	5.21708	5.77197	5.51115				1.44097	2.11671	1.7622	1.83143			Avg	1.88876	1.89311	2.0428	1.8303
				6.00656	5.06672	5.54593	5.07529				2.06362	3.04658	2.21287	0.880327			SD	0.279625	0.437363	0.350647	0.430531
				5.82126	5.14674	5.24262	5.30938				1.74588	2.18775	1.70626	1.39338
				5.69766	5.19027	5.53961	5.54727				1.93178	2.10979	2.15166	2.04592
				5.73973	5.32395	5.75391	5.52839				2.26888	1.81773	2.06678	2.2303
				5.90782	5.16833	5.87378	5.19843				2.00751	1.38537	1.66632	1.89428
				5.6009	5.0065	5.54437	5.53476				2.30251	1.66169	3.19501	1.99513
				5.73205	5.18816	5.85249	5.21016				1.86095	1.96956	1.6726	1.24105
				5.71851	5.2971	5.63699	5.66948				1.81745	1.86111	2.06468	2.09197
				5.84887	5.32214	5.68121	5.69147				2.07158	2.28183	2.22877	1.4668
				5.88892	5.25779	5.60707	5.35713				1.85084	1.96602	2.20389	1.70838
				5.86744	5.11815	5.65938	5.57995				1.5108	1.33349	2.49841	1.54161
				5.68255	5.30813	5.7365	5.60447				2.09603	1.46392	1.66667	2.09058
				5.60515	5.23977	5.55599	5.49617				1.7181	1.30056	2.09141	2.33937
				5.58144	5.4278	5.66465	5.63572				2.25917	2.01247	1.98471	1.74963
				5.77338	5.33089	5.67329	5.61188				1.79847	1.35081	1.99224	1.67787

## Sheet: ND Mem - NOE restraint
Fig. 1C			mean_ind_mem_noe_rg	SS-31	SS-20	SPN4	SPN10			mean_ind_mem_noe_rmsd	SS-31	SS-20	SPN4	SPN10			Rg	SS-31	SS-20	SPN4	SPN10
MD Membrane Data				5.53268	4.91824	5.46883	5.29312				2.12162	1.75896	1.89645	1.01002			Avg	5.4902	4.86494	5.43052	5.07581
(NOE Restraints)				5.60756	5.04256	5.46798	5.36395				1.8707	1.75467	2.09079	1.94469			SD	0.101162	0.120833	0.121636	0.217754
				5.49213	4.73686	5.44464	4.8158				1.9845	1.79221	1.99617	1.4831
				5.38519	4.91249	5.45401	5.22465				1.96705	2.774	2.17481	1.403			RMSD	SS-31	SS-20	SPN4	SPN10
				5.57409	4.78594	5.36028	5.05675				2.10642	2.20504	2.16255	1.56925			Avg	1.92976	2.07202	2.03022	1.43991
				5.50677	5.05956	5.55944	4.82781				1.78381	1.61804	1.84181	1.33061			SD	0.283736	0.350947	0.301597	0.380296
				5.32653	4.74861	5.3753	5.16863				2.04074	2.61421	1.99572	1.02067
				5.34803	4.8048	5.52463	5.00758				1.49206	1.859	1.82871	2.12311
				5.42493	4.76707	5.63071	5.18108				1.25099	1.81053	1.68463	1.40009
				5.4561	4.90856	5.58808	4.67361				1.69057	2.00908	2.05812	1.08985
				5.31846	4.79213	5.41874	4.7749				2.22303	2.14602	2.74139	1.01059
				5.51614	4.92906	5.42652	5.21444				2.14473	2.53424	2.40035	1.01792
				5.42673	5.02277	5.33003	5.02296				2.01994	2.18516	1.84628	1.4502
				5.41837	4.65796	5.03484	5.21007				1.90941	1.78382	1.33254	1.84746
				5.55164	4.68218	5.43087	5.16563				2.18444	1.72348	1.86814	1.12085
				5.52196	4.86237	5.40431	5.18575				2.39921	2.21712	1.96969	1.4396
				5.5907	4.82789	5.40494	5.07953				1.58907	2.67646	2.18462	1.77924
				5.70268	5.03572	5.38875	4.66385				1.86312	1.76937	1.93496	1.14516
				5.57565	4.83985	5.38327	5.19784				1.69436	2.00889	2.52155	2.25844
				5.52771	4.96427	5.51416	5.38817				2.25937	2.20004	2.07508	1.35441
