# Supplementary material for: Structure-activity relationships of mitochondria-targeted tetrapeptide pharmacological compounds
Source: eLife. 2022 Aug 1;11:e75531. doi: 10.7554/eLife.75531 (PMC9342957; doi:10.7554/eLife.75531)
Supplement: Figure 2—source data 1. [file elife-75531-fig2-data1.xlsx]

## Sheet: ITC Binding Curve
Fig. 2A		3 Reps of 8mM 20mol% TOCL (POPC) into 175mM SS-31							3 Reps of 8mM 20mol% TOCL (POPC) into 175mM SPN004							5 Reps of 8mM 20mol% TOCL (POPC) into 125mM SS-20									5 Reps of 8mM 20mol% TOCL (POPC) into 175mM SPN010
ITC Binding Curve
		Injection	Rep 1	Rep 2	Rep 3	Ave	SD		Injection	Rep 1	Rep 2	Rep 3	Ave	SD		Injection	Rep 1	Rep 2	Rep 3	Rep 4	Rep 5	Ave	SD		Injection	Rep 1	Rep 2	Rep 3	Rep 4	Rep 5	Ave	SD
		2	-50.46	-46.91	-47.75	-48.3733	1.85527		2	-46.04	-43.91	-43.34	-44.43	1.42313		2	-30.97	-32.95	-28.74	-29.58	-31.08	-30.664	1.61007		2	-65.06	-65.36	-66.85	-66.82	-66.44	-66.106	0.840464
		3	-50.43	-46.16	-47.39	-47.9933	2.19801		3	-46.17	-42.95	-42.44	-43.8533	2.02243		3	-29	-32.29	-29.2	-29.17	-31.35	-30.202	1.51587		3	-64.45	-64.94	-64.55	-66.31	-64.85	-65.02	0.7492
		4	-50.65	-45.53	-47.09	-47.7567	2.6243		4	-46.16	-42.33	-42.22	-43.57	2.24368		4	-28.38	-32.19	-29.36	-29.49	-31.38	-30.16	1.57056		4	-62.54	-64.42	-62.85	-65.96	-64.33	-64.02	1.3765
		5	-50.32	-45.55	-46.83	-47.5667	2.46885		5	-45.36	-42.22	-42	-43.1933	1.87961		5	-29.01	-31.69	-29.31	-29.02	-31.2	-30.046	1.29442		5	-60.86	-62.89	-60	-64.66	-64.85	-62.652	2.18885
		6	-48.59	-44.98	-46.03	-46.5333	1.85689		6	-44.81	-41.41	-41.24	-42.4867	2.01386		6	-27.39	-30.98	-28.92	-28.43	-30.61	-29.266	1.50683		6	-56.39	-60.84	-55	-61.94	-62.87	-59.408	3.4995
		7	-49.14	-44.38	-45.42	-46.3133	2.50259		7	-44.55	-41.18	-40.42	-42.05	2.19816		7	-27.22	-30.34	-28.92	-28.47	-30.32	-29.054	1.3209		7	-51.84	-58.56	-49.08	-60.94	-61.65	-56.414	5.63948
		8	-50.65	-43.91	-44.86	-46.4733	3.64815		8	-43.23	-41.11	-39.79	-41.3767	1.73543		8	-26.64	-29.89	-28.12	-27.98	-29.57	-28.44	1.31657		8	-37.88	-53.53	-37.55	-58.27	-60.59	-49.564	11.1125
		9	-44.77	-42.51	-43.21	-43.4967	1.15695		9	-41.61	-39.97	-38.47	-40.0167	1.57052		9	-24.08	-27.71	-27.33	-25.83	-27.33	-26.456	1.51142		9	-28.27	-45.09	-27.8	-50.39	-52.68	-40.846	12.0156
		10	-45.82	-40.91	-41.81	-42.8467	2.61401		10	-40.62	-39.15	-36.37	-38.7133	2.15839		10	-23.73	-27.22	-27.03	-25.35	-26.05	-25.876	1.41865		10	-20.71	-33.84	-19.45	-38.16	-48.22	-32.076	12.1383
		11	-42.32	-39.27	-40.14	-40.5767	1.57119		11	-39.05	-38.36	-36.64	-38.0167	1.24114		11	-22.29	-26.58	-26.81	-23.8	-23.22	-24.54	2.04126		11	-14.23	-23.6	-13.28	-27.37	-37.38	-23.172	9.96851
		12	-38.33	-36.74	-37.04	-37.37	0.844808		12	-36.32	-36.27	-33.63	-35.4067	1.53884		12	-19.39	-24.36	-25.72	-20.26	-18.71	-21.688	3.14583		12	-11.01	-17.2	-10.76	-16.14	-22.99	-15.62	5.04865
		13	-36.33	-32.7	-33.35	-34.1267	1.93562		13	-33.51	-34.4	-31.7	-33.2033	1.37588		13	-17.02	-22.55	-23.71	-17.61	-14.83	-19.144	3.8054		13	-9.497	-13.34	-8.878	-13.16	-16.32	-12.239	3.06308
		14	-26.07	-27.73	-27.98	-27.26	1.03812		14	-29.52	-31.81	-27.05	-29.46	2.38057		14	-14.09	-20.24	-22.82	-14.08	-10.69	-16.384	4.98205		14	-10.31	-11.05	-8.124	-11.25	-11.71	-10.4888	1.41509
		15	-19.2	-22.35	-22.89	-21.48	1.99291		15	-24.42	-27.64	-21.72	-24.5933	2.9638		15	-11.11	-16.93	-20.22	-9.516	-7.772	-13.1096	5.25727		15	-7.302	-9.485	-7.269	-8.753	-8.48	-8.2578	0.960715
		16	-18.84	-18.1	-18.72	-18.5533	0.397157		16	-19.33	-21.87	-17.22	-19.4733	2.32831		16	-9.343	-14.32	-17.92	-7.357	-5.076	-10.8032	5.2399		16	-7.546	-8.453	-6.28	-7.859	-7.109	-7.4494	0.816652
		17	-16.69	-14.7	-13.55	-14.98	1.58862		17	-15.93	-19.05	-12.29	-15.7567	3.38333		17	-8.213	-12.35	-14.75	-5.863	-4.475	-9.1302	4.33405		17	-6.706	-7.599	-5.957	-6.275	-5.058	-6.319	0.936919
		18	-13.88	-12.04	-11.01	-12.31	1.45393		18	-12.1	-15.31	-9.41	-12.2733	2.95382		18	-7.578	-10.2	-12.2	-4.622	-3.416	-7.6032	3.68425		18	-6.416	-6.51	-5.201	-6.003	-4.444	-5.7148	0.878352
		19	-9.556	-9.941	-9.084	-9.527	0.429235		19	-10.05	-12.14	-8.128	-10.106	2.00659		19	-6.781	-8.808	-9.686	-3.536	-3.145	-6.3912	2.98071		19	-5.857	-6.402	-4.907	-5.405	-4.044	-5.323	0.903468
		20	-7.043	-8.43	-7.907	-7.79333	0.700452		20	-8.286	-10.67	-6.758	-8.57133	1.97155		20	-7.879	-7.477	-8.214	-2.71	-2.653	-5.7866	2.84661		20	-5.203	-5.699	-4.482	-5.61	-2.65	-4.7288	1.25748

## Sheet: Equil Binding Parameters
Fig. 2B		Binding parameter summary: SS-31							Binding parameter summary: SPN004							Binding parameter summary: SS-20									Binding parameter summary: SPN010
Equilibrium Binding
Parameters from ITC			Rep 1	Rep 2	Rep 3	Avg	SD			Rep 1	Rep 2	Rep 3	Avg	SD			Rep 1	Rep 3	Rep 4	Rep 5	Rep 6	Avg	SD			Rep 1	Rep 2	Rep 3	Rep 4	Rep 5	Avg	SD
Wiseman Plot Fits		KD (M)	3.284e-05	3.224e-05	2.909e-05	3.139e-05	2.01432e-06		KD (M)	3.176e-05	3.057e-05	2.522e-05	2.91833e-05	3.48354e-06		KD (M)	6.947e-05	5.475e-05	2.987e-05	2.289e-05	2.048e-05	3.9492e-05	2.15705e-05		KD (M)	3.716e-05	2.902e-05	3.625e-05	2.018e-05	1.491e-05	2.7504e-05	9.80152e-06
		KD (mM)	32.84	32.24	29.09	31.39	2.01432		KD (mM)	31.76	30.57	25.22	29.1833	3.48354		KD (mM)	69.47	54.75	29.87	22.89	20.48	39.492	21.5705		KD (mM)	37.16	29.02	36.25	20.18	14.91	27.504	9.80152
		n	5.285	5.476	5.409	5.39	0.0969072		n	5.6	6.086	5.492	5.726	0.316411		n	7.137	8.045	8.932	6.812	6.247	7.4346	1.06082		n	2.843	3.445	2.767	3.536	3.842	3.2866	0.464361
		DH (kJ/mol)	-5.369	-4.851	-4.939	-5.053	0.277179		DH (kJ/mol)	-4.797	-4.445	-4.366	-4.536	0.229458		DH (kJ/mol)	-3.287	-3.463	-3.027	-3.052	-3.274	-3.2206	0.181608		DH (kJ/mol)	-7.365	-7.1	-7.404	-7.05	-6.788	-7.1414	0.25195
		DS (J/molK)	67.83	69.72	70.28	69.2767	1.28376		DS (J/molK)	70.02	71.52	73.39	71.6433	1.68838		DS (J/molK)	68.58	69.97	76.47	78.59	78.78	74.478	4.86036		DS (J/molK)	60.11	63.05	60.18	66.24	69.64	63.844	4.10282
		TDS (kJ/mol)	20.2133	20.7766	20.9434	20.6444	0.38256		TDS (kJ/mol)	20.866	21.313	21.8702	21.3497	0.503138		TDS (kJ/mol)	20.4368	20.8511	22.7881	23.4198	23.4764	22.1944	1.44839		TDS (kJ/mol)	17.9128	18.7889	17.9336	19.7395	20.7527	19.0255	1.22264
		DG1 (kJ/mol)	-25.5781	-25.6238	-25.8785	-25.6935	0.161875		DG1 (kJ/mol)	-25.661	-25.7556	-26.2322	-25.8829	0.306178		DG1 (kJ/mol)	-23.7218	-24.3118	-25.813	-26.4724	-26.748	-25.4134	1.3358		DG1 (kJ/mol)	-25.2719	-25.8845	-25.3334	-26.7846	-27.5344	-26.1618	0.978151
		DG2 (kJ/mol)	-25.5823	-25.6276	-25.8824	-25.6974	0.161797		DG2 (kJ/mol)	-25.663	-25.758	-26.2362	-25.8857	0.307242		DG2 (kJ/mol)	-23.7238	-24.3141	-25.8151	-26.4718	-26.7504	-25.415	1.33533		DG2 (kJ/mol)	-25.2778	-25.8889	-25.3376	-26.7895	-27.5407	-26.1669	0.978587
		TDS/|DH|	3.76482	4.28294	4.24042	4.09606	0.287648		TDS/|DH|	4.34979	4.79482	5.00921	4.71794	0.336364		TDS/|DH|	6.21747	6.0211	7.52827	7.6736	7.17057	6.9222	0.758654		TDS/|DH|	2.43215	2.64632	2.42216	2.79993	3.05727	2.67157	0.267117
