# Supplementary material for: Structure-activity relationships of mitochondria-targeted tetrapeptide pharmacological compounds
Source: eLife. 2022 Aug 1;11:e75531. doi: 10.7554/eLife.75531 (PMC9342957; doi:10.7554/eLife.75531)
Supplement: Figure 3—figure supplement 5—source data 1. [file elife-75531-fig3-figsupp5-data1.xlsx]

## Sheet: trNOE Buildup Curves
Fig. 3-	mix time (ms)	NOE: F4(Hd)-K3(Hb)	NOE: Y2(He)-K3(Hg)	NOE: Y2(He)-Y2(Ha)	NOE: Y2(He)-R1(Hb)
figure	0	0	0	0	0
supplement 5	50	69.303	101.18	22.345	243.91
	75	62.459	106.4	15.195	247.98
	100	48.757	101.7	39.27	249.08
	150	103.96	135.27	65.476	356.44
	200	127.98	256.73	80.355	447.54
	300	159.28	299.11	104.69	551.27
	400	225.25	490.53	146.48	575.13
	600	219.67	554.07	171.56	593.33
	800	290.33	605.36	189.8	547.43
