# Supplementary material for: Structure-activity relationships of mitochondria-targeted tetrapeptide pharmacological compounds
Source: eLife. 2022 Aug 1;11:e75531. doi: 10.7554/eLife.75531 (PMC9342957; doi:10.7554/eLife.75531)
Supplement: Figure 4—figure supplement 8—source data 1. [file elife-75531-fig4-figsupp8-data1.xlsx]

## Sheet: Bilayer Thickness and APL
Fig. 4-		Panel B	Number	SS-31	SS-20	SPN4	SPN10		Panel D	Number	SS-31	SS-20	SPN4	SPN10
figure		Bilayer	0	37.5113	38.5796	38.9769	39.0247		Area per	0	82.8765	79.0075	78.1373	79.0299
supplement 8		Thickness	1	37.9094	39.0415	39.2288	38.7151		Lipid	1	82.1726	77.9575	77.4505	79.6172
			2	37.792	39.4114	39.2333	38.5122			2	82.4193	76.8333	77.5578	80.2129
			3	38.1372	38.9574	39.129	38.5232			3	81.771	77.9604	77.5801	80.377
			4	37.6805	38.7872	39.6041	38.1445			4	83.2046	78.1983	76.7328	81.0967
			5	37.6193	39.0859	38.9529	38.1568			5	83.032	77.8293	78.2845	80.8664
			6	37.8648	39.0004	39.0336	38.7208			6	82.5602	78.0847	78.161	79.6368
			7	37.9895	39.4794	38.9358	38.3517			7	81.95	77.0443	78.1011	80.3097
			8	38.5332	39.3797	39.16	38.9501			8	80.3562	77.1995	77.6557	78.9407
			9	38.2401	38.914	39.136	38.803			9	81.1146	78.6329	77.5824	79.3463
			10	38.1265	39.3383	38.9657	38.9004			10	81.8023	77.6199	78.128	79.0924
			11	38.1539	38.9144	39.2195	38.2838			11	81.8356	78.8314	77.6436	80.8263
			12	38.0785	38.9045	38.9829	38.2883			12	82.1177	78.6629	78.2118	80.9622
			13	38.6041	38.9893	39.3515	38.5968			13	80.7466	78.5908	77.6136	80.3554
			14	38.1286	38.9412	38.8602	38.7826			14	81.961	78.3085	78.5624	79.506
			15	38.054	38.7079	38.7027	38.7054			15	82.0392	78.9901	79.3153	79.211
			16	38.2433	39.0948	38.7095	38.7187			16	81.3042	78.0823	79.1844	79.6183
			17	38.1918	39.1063	38.7988	38.7801			17	81.5488	77.7944	79.1305	79.2012
			18	38.0946	39.0402	38.8038	38.9372			18	81.623	78.2077	78.7557	78.9805
			Avg	38.0501	39.0354	39.0413	38.6261			Avg	81.9177	78.0966	78.0941	79.8519
			SD	0.279274	0.235868	0.230049	0.271868			SD	0.73407	0.624695	0.673948	0.739275
