# Supplementary material for: Structure-activity relationships of mitochondria-targeted tetrapeptide pharmacological compounds
Source: eLife. 2022 Aug 1;11:e75531. doi: 10.7554/eLife.75531 (PMC9342957; doi:10.7554/eLife.75531)
Supplement: Figure 4—source data 1. [file elife-75531-fig4-data1.xlsx]

## Sheet: NMR-MD Comparison
Fig. 4B		Number	SS-31	SS-31 NOE	SS-20	SS-20 NOE	SPN004	SPN004 NOE	SPN010	SPN010 NOE
NMR-MD		1	2.3999	30.885	7.4796	45.455	0.77496	61.31	0	67.544
Comparison		2	9.3645	52.066	4.7748	0.14284	1.8649	59.678	0	21.937
		3	2.8499	33.109	0	0.010203	3.7398	59.269	0.019999	1.9488
		4	2.2799	75.554	9.6645	0.29589	0.73496	63.065	0.0049997	56.147
		5	1.6249	57.413	0	5.0199	4.2698	44.271	0.064997	71.738
		6	6.5497	54.566	5.1797	94.786	3.2698	88.95	0	0.040812
		7	4.7448	34.935	5.5797	0.89787	11.279	69.228	0.0049997	0.061218
		8	11.909	90.266	0.25499	0.13264	2.7949	36.17	0	1.8978
		9	1.2799	44.016	0.044998	0.071421	0.18999	83.114	0.019999	92.389
		10	13.134	6.5912	0.039998	34.782	0.33498	38.527	0	0.020406
		11	1.7349	23.569	3.6098	58.147	0.22999	7.9278	0.019999	0
		12	1.3349	45.332	9.8395	24.712	0.95995	47.393	0	14.243
		13	7.0146	64.657	0.69497	9.0807	0.94495	92.133	0	0.061218
		14	0.88496	76.431	0.90495	85.093	1.1499	84.022	0	0.30609
		15	3.2498	34.241	0.18499	6.2443	0.91495	71.778	0	97.664
		16	1.7549	57.168	9.6895	0.71421	1.2749	52.556	0	31.446
		17	17.779	95.113	0	0.92848	0.64997	60.412	0	35.823
		18	16.669	73.544	0	0.91827	1.0099	50.944	0	0.31629
		19	5.5847	87.562	0.0049997	1.408	1.1849	38.486	0	55.076
		20	1.8299	5.2444	0	36.609	1.3999	50.423	0	93.399
		Avg	5.69866	52.1131	2.89735	20.2724	1.94862	57.9828	0.00674967	32.1029
		SD	5.32226	26.1573	3.75116	29.7051	2.48383	20.4877	0.0154976	36.3054

## Sheet: Membrane Insertion Depths
Fig. 4C		SS-31	Ester C	Lipid P	R1 arg1	R2 Dmt2	R3 Lys4	R4 Phe4		SPN4	Ester C	Lipid P	R1 arg1	R2 Tyr2	R3 Lys4	R4 Phe4		SS-20	Ester C	Lipid P	R1 Phe1	R2 arg2	R3 Phe3	R4 Lys4		SPN10	Ester C	Lipid P	R1 Trp1	R2 Arg2	R3 Trp3	R4 Lys4
Membrane Insertion			14.4673	19.0199	17.1905	15.3823	19.123	15.5414			14.9539	19.5234	18.1914	21.9217	23.8956	24.4319			14.967	19.5158	20.8083	16.7776	15.3519	19.9657			14.7468	19.3079	16.3245	19.5362	15.9208	20.1015
Depths (Zpos)					17.99	15.9473	19.2186	15.5779					18.7433	16.6992	19.7559	16.9446					21.3784	17.9811	18.8495	22.1257					18.7009	16.0544	16.4931	18.5968
					18.346	17.0042	18.6079	16.1171					21.12	22.7937	24.0496	23.8866					18.7541	16.83	14.9749	18.0688					18.5288	18.8792	19.4794	20.5266
					16.0901	13.9875	17.8745	15.6897					19.0559	18.5017	21.3267	18.7245					17.5453	20.3676	21.4671	19.3162					17.5078	20.0651	16.1185	19.4449
					18.6407	16.1116	18.5782	15.3681					19.6229	20.6124	22.8685	22.1692					17.5976	18.4238	18.9363	20.6509					15.8985	18.6074	15.3604	18.8898
					18.8312	15.7717	19.0663	14.4916					18.3251	16.0336	19.1657	15.3873					16.4552	20.2733	20.6396	21.2768					14.9134	18.7212	15.8089	18.1501
					16.642	14.2893	17.201	14.3507					19.7015	23.2859	24.928	26.2151					20.4194	20.7438	23.4665	24.6063					15.4408	18.2162	15.2023	19.9477
					16.839	13.6974	17.2617	14.0611					19.689	18.6373	22.0152	18.3943					19.3425	18.5664	18.9622	21.2443					17.5753	18.5226	22.3058	22.276
					17.3791	16.3589	19.2364	15.9226					16.8958	14.6556	18.2771	14.749					19.9748	18.279	19.6824	22.2858					16.2673	19.4016	16.2235	20.749
					16.3827	13.6429	17.6533	14.8938					18.8737	17.7097	20.7321	16.6508					17.3965	17.5036	15.1591	18.615					15.0205	18.3389	14.3741	16.9899
					18.7624	22.7947	24.2194	26.7648					19.7256	22.4084	24.3259	25.0271					20.5581	19.5816	22.1942	23.8744					15.8425	18.8584	15.0011	18.7962
					18.0714	16.1429	19.2544	15.0943					18.0795	18.9823	21.8055	21.4507					19.1449	19.5925	20.4909	22.1773					16.3452	20.0856	16.973	21.3894
					16.0835	13.2214	16.1502	13.0824					19.6824	23.3898	25.1454	25.7599					19.1329	19.3637	16.268	19.2688					18.7074	18.7231	17.646	19.1779
					17.9009	15.157	18.4157	15.2375					18.7322	20.7444	17.4906	14.5809					16.1403	16.8195	16.5076	18.8423					16.3868	19.8562	22.222	19.4928
					17.4866	15.7079	18.7334	15.3074					19.4259	22.8293	23.7047	24.7508					18.1864	17.647	15.8146	17.958					16.1796	19.4672	17.0999	21.4265
					17.6338	15.5971	18.3253	16.9452					18.9374	20.2779	22.0515	21.7398					20.486	20.5686	23.7053	25.2231					15.1507	19.6172	17.0482	21.3722
					17.7634	15.5762	18.6884	14.3118					19.6069	22.1057	23.9069	23.698					19.1166	17.8629	19.6346	22.0099					16.731	19.2171	16.4454	20.0553
					15.397	13.7552	17.6257	14.1948					17.9882	15.0996	17.7066	13.8987					14.8581	19.0686	16.7859	19.0001					15.9407	18.9186	15.4044	18.9243
					16.8498	15.3543	19.1966	15.474					19.2544	17.9995	20.3162	18.0527					20.7003	21.6643	24.62	25.1195					18.5299	18.7219	15.7964	19.3972
					18.1331	15.8071	18.5917	14.4114					19.2312	18.8772	21.4912	19.0951					15.9591	19.5366	16.1199	18.0715					14.8813	18.8481	17.5741	22.2219
				Avg	17.4207	15.5653	18.6511	15.6419				Avg	19.0441	19.6782	21.7479	20.2804				Avg	18.6977	18.8726	18.9815	20.985				Avg	16.5436	18.9328	16.9249	19.8963
				SD	0.969096	2.00241	1.55335	2.75677				SD	0.889669	2.77024	2.39065	4.11125				SD	1.86652	1.42763	3.05258	2.39868				SD	1.29249	0.872296	2.14658	1.38601

## Sheet: SASA
Fig. 4D		Total	Rep	SS-31	SS-20	SPN4	SPN10	No Pep		Acyl Chain	Rep	SS-31	SS-20	SPN4	SPN10	No Pep		Headgroup	Rep	SS-31	SS-20	SPN4	SPN10	No Pep		Peptide	Rep	SS-31	SS-20	SPN4	SPN10
SASA		SASA	1	3.12814	3.17969	3.17878	2.94576	2.98423		SASA	1	2.8895	3.13956	3.04882	2.67123	3.49124		SASA	1	2.37643	2.28214	2.19708	2.1954	2.63509		SASA	1	4.62748	5.83584	6.7681	4.83235
Parameters			2	3.09828	3.09068	3.16697	2.95547	2.99467			2	2.7576	2.96978	2.98955	2.65535	3.55683			2	2.36784	2.2183	2.17658	2.24522	2.63897			2	4.54669	5.75402	6.9143	4.44708
			3	3.07751	3.06555	3.16168	2.99604	2.96129			3	2.78031	2.92599	3.01246	2.68951	3.46446			3	2.3606	2.18564	2.19086	2.27239	2.61483			3	4.38874	5.87306	6.69568	4.54687
			4	3.06154	3.13158	3.19808	2.99907	2.96838			4	2.76003	3.16328	3.00176	2.80286	3.53235			4	2.35915	2.20606	2.19575	2.26662	2.61513			4	4.26381	6.09194	7.02149	4.52153
			5	3.14505	3.14477	3.1794	3.06963	2.99315			5	2.91532	3.11446	3.05767	2.86567	3.57592			5	2.40543	2.21851	2.15199	2.26719	2.63555			5	4.48077	6.14803	7.21633	5.15859
			6	3.14283	3.07498	3.18546	3.0626	3.00645			6	2.94743	2.98615	3.0476	2.84283	3.67106			6	2.37289	2.20491	2.2019	2.2749	2.63933			6	4.75185	5.71446	6.78797	5.03413
			7	3.11255	3.10317	3.14565	3.02012	2.98623			7	2.85065	3.01708	2.9798	2.72211	3.5433			7	2.39417	2.2197	2.16236	2.26876	2.63189			7	4.33311	5.81754	6.85303	4.79145
			8	3.07107	3.09445	3.14896	3.02875	2.97366			8	2.76879	2.93225	2.96562	2.81424	3.4561			8	2.33929	2.20853	2.17381	2.26074	2.62804			8	4.54894	5.92688	6.78586	4.86583
			9	2.99938	3.10173	3.11496	2.99537	3.00394			9	2.60706	3.03889	2.90993	2.64945	3.59936			9	2.3052	2.22292	2.21577	2.25938	2.644			9	4.33459	5.7491	6.08196	4.71042
			10	3.08411	3.15446	3.08212	3.00456	3.06127			10	2.87049	3.08624	2.94734	2.73811	3.73727			10	2.31219	2.28219	2.16023	2.25537	2.68753			10	4.84863	5.63638	6.27147	4.75375
			11	3.11352	3.07258	3.16661	2.99969	3.00763			11	2.8508	2.95356	3.0021	2.74988	3.66696			11	2.36208	2.26466	2.20163	2.254	2.64092			11	4.66354	5.12564	6.64758	4.70693
			12	3.11718	3.15743	3.13431	3.09028	3.04666			12	2.80586	3.16103	2.94036	2.87052	3.74746			12	2.36189	2.31197	2.19524	2.32543	2.6719			12	4.74699	5.2935	6.45035	4.7778
			13	3.1194	3.0967	3.16341	3.10199	2.99439			13	2.80989	2.93586	2.96424	2.95628	3.57848			13	2.34091	2.27324	2.25098	2.35434	2.63653			13	4.97487	5.2987	6.15997	4.52006
			14	3.0692	3.10907	3.1017	3.03295	2.99901			14	2.71454	3.03531	2.92254	2.77271	3.57678			14	2.31852	2.27866	2.2056	2.30113	2.64132			14	4.79224	5.26877	6.03836	4.54548
			15	3.11568	3.13908	3.09816	2.99765	3.034			15	2.78741	3.00653	2.8923	2.69275	3.70823			15	2.3717	2.26749	2.20631	2.26048	2.66316			15	4.65224	5.70929	6.02622	4.6789
			16	3.09856	3.16275	3.16536	2.98769	3.00919			16	2.78152	3.04366	2.95109	2.66421	3.65146			16	2.35969	2.27641	2.25895	2.27772	2.64403			16	4.60702	5.81969	6.11295	4.43546
			17	3.05644	3.14938	3.12891	3.04064	2.99225			17	2.63162	3.02201	2.93021	2.77095	3.55937			17	2.32546	2.24818	2.23078	2.29575	2.6363			17	4.67805	5.98994	6.051	4.6778
			18	3.07318	3.07852	3.09623	2.97914	3.0269			18	2.79806	2.97351	2.95499	2.61055	3.66111			18	2.31969	2.21647	2.23818	2.26276	2.66078			18	4.73666	5.64694	5.62541	4.55325
			19	3.06289	3.09646	3.11882	2.97765	3.01166			19	2.77067	3.0383	2.9574	2.66182	3.64186			19	2.33818	2.24812	2.25743	2.27176	2.64746			19	4.47631	5.44504	5.65641	4.39703
			Avg	3.09192	3.11595	3.14398	3.015	3.00289			Avg	2.79461	3.0286	2.97241	2.74742	3.60103			Avg	2.35217	2.2439	2.20376	2.27207	2.64278			Avg	4.60276	5.69183	6.42971	4.68183
			SD	0.0356065	0.0349195	0.0342531	0.0428731	0.0255873			SD	0.0855516	0.0753359	0.0470208	0.0926571	0.086199			SD	0.0276959	0.0352654	0.0320635	0.0323538	0.0178264			SD	0.190094	0.287208	0.465158	0.202474
