# Supplementary material for: Structure-activity relationships of mitochondria-targeted tetrapeptide pharmacological compounds
Source: eLife. 2022 Aug 1;11:e75531. doi: 10.7554/eLife.75531 (PMC9342957; doi:10.7554/eLife.75531)
Supplement: Figure 5—figure supplement 1—source data 1. [file elife-75531-fig5-figsupp1-data1.xlsx]

## Sheet: ANS With and Without Membrane
Fig. 5A (main text)		ANS time	Time (s)	SS-31	SPN4	SS-20	SPN 10	Neg Cont			Fig. 5 -	ANS time	Time (s)	SS-31 (pep only)	SPN4 (pep only)	SS-20 (pep only)	SPN 10 (pep only)
1,8-ANS		course data	0	0.24519	0.2077	0.251728	0.275725	0.243			figure	course data	0	0.190145	0.212297	0.205211	0.20202
Measurements			1	0.243609	0.207894	0.251483	0.275349	0.242613			supplement 1		1	0.194973	0.224246	0.205652	0.2275
(ys assay)			2	0.245492	0.208916	0.250992	0.275056	0.246665					2	0.19805	0.226289	0.222616	0.198361
Mitoplasts			3	0.245503	0.208865	0.252217	0.274949	0.244763					3	0.200617	0.206673	0.226371	0.210122
			4	0.243715	0.208699	0.251893	0.27495	0.241794					4	0.196563	0.225113	0.20615	0.198298
			5	0.243749	0.209488	0.250263	0.27335	0.242737					5	0.198213	0.210233	0.209603	0.210095
			6	0.244002	0.209989	0.253981	0.273807	0.249657					6	0.202726	0.215269	0.206022	0.21312
			7	0.243144	0.207686	0.252721	0.273226	0.244368					7	0.198956	0.211812	0.213728	0.194676
			8	0.242083	0.208521	0.249885	0.274286	0.244582					8	0.193598	0.21111	0.20593	0.211829
			9	0.247953	0.212241	0.251701	0.274771	0.242251					9	0.188535	0.208582	0.204887	0.197964
			10	0.245533	0.207035	0.251056	0.272425	0.242157					10	0.197265	0.223565	0.207204	0.197034
			11	0.243726	0.211864	0.24982	0.273348	0.24204					11	0.190359	0.211502	0.209151	0.197711
			12	0.241664	0.206598	0.249462	0.27241	0.243284					12	0.193557	0.222327	0.206752	0.197549
			13	0.24131	0.206633	0.250271	0.272313	0.242064					13	0.200393	0.211285	0.201573	0.201143
			14	0.244281	0.207293	0.250077	0.271698	0.243007					14	0.196002	0.223225	0.204527	0.196943
			15	0.241562	0.20653	0.24978	0.272286	0.242414					15	0.187425	0.208252	0.221249	0.199039
			16	0.242631	0.209421	0.248905	0.272169	0.242391					16	0.198203	0.212617	0.218746	0.196383
			17	0.241198	0.207032	0.24899	0.271086	0.247774					17	0.197113	0.208024	0.230566	0.229126
			18	0.240704	0.206825	0.250057	0.272089	0.241411					18	0.197714	0.217755	0.20637	0.198416
			19	0.240092	0.207444	0.249056	0.271039	0.241719					19	0.187181	0.225134	0.203925	0.201342
			20	0.240087	0.207592	0.249198	0.271	0.241146					20	0.19206	0.215846	0.210287	0.203185
			21	0.23982	0.209119	0.254903	0.27124	0.241124					21	0.195014	0.207096	0.209313	0.20407
			22	0.239911	0.207866	0.249789	0.271334	0.240833					22	0.186009	0.22115	0.201086	0.198398
			23	0.241328	0.207353	0.249986	0.271078	0.243603					23	0.19097	0.206714	0.227796	0.197377
			24	0.238432	0.208409	0.249035	0.270483	0.24395					24	0.18387	0.218127	0.207448	0.216733
			25	0.238515	0.207206	0.249258	0.270971	0.242152					25	0.195381	0.223256	0.211666	0.205651
			26	0.240149	0.207716	0.249532	0.270786	0.247042					26	0.195839	0.214587	0.203438	0.197214
			27	0.23931	0.210859	0.248329	0.270158	0.241014					27	0.198814	0.225319	0.204226	0.217176
			28	0.239545	0.207537	0.24913	0.269596	0.240883					28	0.202613	0.226878	0.229812	0.197549
			29	0.23901	0.208573	0.248444	0.269821	0.245463					29	0.199792	0.219706	0.210437	0.193403
			30	0.239735	0.207077	0.252681	0.270014	0.241488					30	0.19699	0.222575	0.204539	0.222713
			31	0.239811	0.211997	0.248596	0.270804	0.239494					31	0.184389	0.225402	0.20411	0.195932
			32	0.244845	0.208347	0.248845	0.269543	0.240877					32	0.184053	0.211399	0.206138	0.200231
			33	0.238357	0.208499	0.248446	0.269427	0.243252					33	0.185744	0.219685	0.206579	0.198217
			34	0.238819	0.207131	0.2522	0.269538	0.241408					34	0.184603	0.216228	0.203589	0.200041
			35	0.238544	0.206704	0.249221	0.269339	0.239573					35	0.184807	0.213163	0.207737	0.198994
			36	0.237243	0.207234	0.248646	0.268508	0.24029					36	0.195157	0.225371	0.214053	0.196808
			37	0.240339	0.207296	0.248464	0.268858	0.239769					37	0.199272	0.218746	0.211098	0.200294
			38	0.240007	0.210729	0.248772	0.269052	0.240081					38	0.197856	0.215031	0.217205	0.198163
			39	0.238142	0.207111	0.247525	0.268957	0.240124					39	0.191398	0.214897	0.203369	0.196898
			40	0.23691	0.207029	0.25177	0.270778	0.239812					40	0.185805	0.213514	0.21491	0.220139
			41	0.236793	0.205911	0.247699	0.268189	0.239763					41	0.197469	0.225804	0.201596	0.19838
			42	0.238094	0.207802	0.250534	0.268692	0.242019					42	0.196155	0.222719	0.205014	0.200882
			43	0.237411	0.206396	0.248481	0.268455	0.238545					43	0.203602	0.22662	0.206266	0.198804
			44	0.237793	0.205794	0.246663	0.269228	0.238682					44	0.184023	0.209025	0.239651	0.199671
			45	0.237283	0.206875	0.248971	0.269636	0.245275					45	0.18552	0.226547	0.202256	0.197142
			46	0.237339	0.205589	0.24666	0.268205	0.238704					46	0.198274	0.222781	0.207784	0.201053
			47	0.237487	0.204147	0.246873	0.267293	0.244341					47	0.193445	0.219396	0.227031	0.204729
			48	0.238655	0.204766	0.247449	0.26828	0.238947					48	0.188984	0.208128	0.202164	0.201875
			49	0.235311	0.204606	0.246042	0.266567	0.238937					49	0.189259	0.222079	0.203288	0.206066
			50	0.237886	0.204932	0.246833	0.267829	0.246777					50	0.196277	0.210119	0.202511	0.199662
			51	0.242131	0.207311	0.246714	0.267831	0.244209					51	0.203327	0.210635	0.202245	0.201451
			52	0.236281	0.204655	0.245824	0.267404	0.23893					52	0.196573	0.225247	0.209893	0.22115
			53	0.23655	0.205401	0.247132	0.267968	0.238756					53	0.194352	0.223493	0.226301	0.239197
			54	0.236791	0.203972	0.247509	0.267355	0.23905					54	0.193496	0.222523	0.208549	0.199536
			55	0.238724	0.205245	0.246678	0.266849	0.239942					55	0.197408	0.221037	0.210461	0.247073
			56	0.235979	0.204375	0.246335	0.267498	0.238474					56	0.183666	0.217229	0.204006	0.198741
			57	0.241473	0.205398	0.246066	0.266584	0.242346					57	0.195992	0.224473	0.207367	0.206816
			58	0.235065	0.203964	0.247135	0.267408	0.238582					58	0.196664	0.223483	0.199707	0.200836
			59	0.374985	0.391035	0.249071	0.319484	0.316475					59	0.185704	0.219603	0.212639	0.206762
			60	0.841325	0.880351	0.665404	0.778778	0.779756					60	0.190807	0.22018	0.23556	0.202787
			61	0.895413	0.946835	0.857764	0.895667	0.888454					61	0.190522	0.214422	0.204342	0.191145
			62	0.946537	0.979018	0.940284	0.957463	0.945044					62	0.192111	0.216651	0.205489	0.189157
			63	0.96861	0.989425	0.962497	0.985388	0.964154					63	0.190074	0.220273	0.201607	0.212046
			64	0.981237	0.994208	0.981533	0.992261	0.980575					64	0.190512	0.217332	0.2052	0.194026
			65	0.988783	1.00146	0.98527	0.997834	0.981905					65	0.200953	0.223606	0.1998	0.213843
			66	0.991416	1.00231	0.991969	1.00007	0.988601					66	0.184349	0.223864	0.200043	0.19333
			67	0.994842	1.00329	0.995376	1.00513	0.990805					67	0.191897	0.207622	0.221434	0.212
			68	0.99838	1.00248	0.997447	1.00677	0.993504					68	0.193608	0.225753	0.204713	0.194261
			69	0.999742	1.00637	0.999605	1.0085	0.995492					69	0.184705	0.218065	0.194631	0.208297
			70	0.999075	1.00242	1.0057	1.0081	0.9997					70	0.196736	0.223575	0.242791	0.192247
			71	0.999809	1.00579	1.00816	1.00815	0.998917					71	0.195198	0.221398	0.196821	0.193394
			72	1.00122	1.00534	1.00765	1.00963	1.00265					72	0.201758	0.218633	0.1971	0.203916
			73	1.00156	1.00542	1.00578	1.00879	1.00574					73	0.187945	0.207694	0.210148	0.21891
			74	1.00227	1.00512	1.00612	1.00994	1.00211					74	0.201055	0.209366	0.195582	0.205813
			75	1.00328	1.00382	1.00709	1.00745	1.00284					75	0.195768	0.220531	0.196706	0.208207
			76	1.00353	1.01205	1.0095	1.00823	1.00532					76	0.191999	0.216383	0.194342	0.20024
			77	1.0043	1.00587	1.00715	1.00857	1.00437					77	0.191021	0.221522	0.195338	0.193195
			78	1.00451	1.00152	1.00797	1.00845	1.00529					78	0.202695	0.224267	0.194805	0.193339
			79	1.00415	0.998376	1.01104	1.00853	1.00531					79	0.200709	0.216012	0.210843	0.210573
			80	1.00726	0.994729	1.00906	1.00801	1.01491					80	0.189982	0.218901	0.195106	0.196835
			81	1.00506	1.00399	1.01545	1.00811	1.00911					81	0.185143	0.210965	0.209893	0.189916
			82	1.00475	0.99569	1.01068	1.00871	1.00893					82	0.198315	0.210388	0.193878	0.193502
			83	1.00523	0.992584	1.01125	1.00571	1.00663					83	0.197999	0.209469	0.1936	0.202011
			84	1.00617	0.995094	1.01025	1.00683	1.00989					84	0.201585	0.225309	0.228932	0.200285
			85	1.00559	0.997992	1.01165	1.0059	1.00722					85	0.187883	0.206962	0.194747	0.193276
			86	1.00663	1.00001	1.01263	1.0056	1.01131					86	0.192916	0.226527	0.194655	0.194478
			87	1.00596	1.00183	1.01193	1.00603	1.009					87	0.185276	0.221429	0.195779	0.195814
			88	1.00763	1.01074	1.01423	1.0067	1.00847					88	0.184583	0.207075	0.197795	0.22974
			89	1.01109	1.00583	1.01272	1.0048	1.00719					89	0.200423	0.225464	0.231238	0.198687
			90	1.00815	1.01124	1.01251	1.00818	1.01085					90	0.19531	0.21078	0.195153	0.1924
			91	1.00772	1.00654	1.00888	1.00672	1.00903					91	0.203388	0.224215	0.20411	0.200231
			92	1.00739	1.00332	1.01263	1.00805	1.01111					92	0.190614	0.223379	0.195779	0.194568
			93	1.00725	1.00451	1.01144	1.00668	1.00906					93	0.196929	0.225154	0.213126	0.194405
			94	1.00948	1.01029	1.01336	1.00517	1.00848					94	0.186885	0.211223	0.193531	0.195218
			95	1.00735	1.00915	1.01248	1.00612	1.00728					95	0.194342	0.221893	0.197494	0.232956
			96	1.00816	1.00462	1.01322	1.00672	1.01007					96	0.18496	0.223018	0.195802	0.19744
			97	1.00918	1.00807	1.01354	1.00519	1.01031					97	0.184176	0.222605	0.195802	0.206238
			98	1.00983	1.00449	1.01513	1.00466	1.00914					98	0.188963	0.226589	0.20447	0.194956
			99	1.008	1.00397	1.01338	1.00521	1.01131					99	0.1855	0.209273	0.194736	0.2064
			100	1.00834	1.0065	1.01356	1.00611	1.01173					100	0.190675	0.208881	0.196196	0.197991
			101	1.00749	1.00583	1.01266	1.00695	1.00875					101	0.190206	0.208169	0.197656	0.197982
			102	1.01317	1.0051	1.01434	1.00421	1.01445					102	0.184267	0.212462	0.192731	0.208541
			103	1.00847	1.00792	1.01234	1.00412	1.01033					103	0.196603	0.212255	0.195987	0.220346
			104	1.0085	1.0058	1.01402	1.00531	1.01401					104	0.202919	0.217528	0.194817	0.196672
			105	1.00912	1.01256	1.0131	1.00632	1.01152					105	0.197907	0.208654	0.193334	0.195814
			106	1.00981	1.00529	1.01277	1.00413	1.01267					106	0.188199	0.222915	0.230253	0.198479
			107	1.00971	1.00987	1.01474	1.00376	1.0115					107	0.188739	0.224288	0.19535	0.208821
			108	1.01237	1.009	1.01323	1.00541	1.01282					108	0.198824	0.226713	0.197285	0.195056
			109	1.01066	1.00762	1.01111	1.00363	1.01134					109	0.187782	0.210511	0.201434	0.194143
			110	1.00893	1.00497	1.01344	1.003	1.01942					110	0.193914	0.209655	0.194539	0.192816
			111	1.01081	1.00922	1.01406	1.00372	1.01301					111	0.191571	0.223637	0.192383	0.194342
			112	1.0097	1.0026	1.01344	1.00307	1.01326					112	0.203235	0.216331	0.193345	0.196627
			113	1.0102	1.00128	1.01373	1.00365	1.01635					113	0.199028	0.212967	0.20148	0.192653
			114	1.00967	1.00325	1.01573	1.00651	1.01294					114	0.195035	0.210346	0.19601	0.195986
			115	1.00928	1.00381	1.01084	1.00481	1.01323					115	0.203683	0.225299	0.197088	0.19417
			116	1.0073	1.00095	1.01647	1.0052	1.01544					116	0.184298	0.21563	0.197772	0.211937
			117	1.00722	0.997761	1.01316	1.00601	1.01531					117	0.199364	0.208427	0.195837	0.202444
			118	1.00387	0.978493	1.01367	1.00144	1.01498					118	0.200036	0.217828	0.191665	0.193701
			119	1.00435	0.981136	1.01128	1.00301	1.00996					119	0.185286	0.225794	0.204852	0.193592
			120	1.04316	1.02488	1.03256	1.06684	1.00717					120	0.201615	0.208871	0.192708	0.199201
			121	1.07533	1.04056	1.05536	1.12744	1.00546					121	0.203561	0.216558	0.194226	0.20052
			122	1.08685	1.04656	1.05874	1.15464	1.00727					122	0.193822	0.207643	0.1963	0.202029
			123	1.08466	1.04418	1.06108	1.16097	1.00742					123	0.190501	0.211863	0.200947	0.204666
			124	1.08595	1.04565	1.06466	1.16336	1.01487					124	0.184512	0.225072	0.194353	0.199445
			125	1.08757	1.04521	1.06716	1.16504	1.00757					125	0.185357	0.22339	0.19207	0.215884
			126	1.08935	1.04422	1.06333	1.16469	1.00942					126	0.193262	0.206497	0.20878	0.201866
			127	1.08881	1.04995	1.06688	1.16566	1.00762					127	0.191948	0.2221	0.202801	0.208893
			128	1.088	1.04502	1.07021	1.16632	1.00824					128	0.196338	0.213814	0.196231	0.205967
			129	1.09077	1.04459	1.06582	1.16584	1.01083					129	0.189136	0.214629	0.197806	0.203709
			130	1.08991	1.04574	1.0637	1.16691	1.01539					130	0.19422	0.217838	0.194284	0.199527
			131	1.09071	1.04761	1.07076	1.17169	1.01074					131	0.196512	0.210873	0.246325	0.202065
			132	1.08939	1.05199	1.06509	1.16961	1.01188					132	0.196776	0.219489	0.195628	0.20706
			133	1.08981	1.04497	1.06826	1.17153	1.00761					133	0.188586	0.209541	0.194284	0.204684
			134	1.09049	1.05563	1.06822	1.17191	1.00945					134	0.18931	0.215795	0.214238	0.196528
			135	1.08998	1.04268	1.06603	1.17056	1.00935					135	0.201075	0.212957	0.220704	0.227356
			136	1.08991	1.04831	1.06568	1.17235	1.00935					136	0.199211	0.217157	0.194481	0.204269
			137	1.09037	1.04272	1.06633	1.17237	1.01147					137	0.184074	0.206631	0.200136	0.211278
			138	1.08672	1.02857	1.06508	1.17052	1.00923					138	0.187435	0.223121	0.205118	0.203645
			139	1.07936	1.02266	1.06297	1.16337	1.00356					139	0.196288	0.207447	0.19477	0.24001
			140	1.1061	1.06652	1.07416	1.19237	1.00377					140	0.198254	0.214711	0.20462	0.207665
			141	1.12507	1.06998	1.09334	1.2295	1.0024					141	0.190756	0.225216	0.196022	0.215198
			142	1.13008	1.07466	1.09806	1.24578	1.00712					142	0.19149	0.212864	0.195582	0.204774
			143	1.13275	1.07775	1.1031	1.25041	1.0033					143	0.193812	0.215939	0.19637	0.209029
			144	1.13399	1.07488	1.10137	1.25267	1.00465					144	0.202644	0.210738	0.199023	0.210113
			145	1.13624	1.0811	1.09947	1.25563	1.00457					145	0.192386	0.21856	0.196288	0.204422
			146	1.13487	1.07473	1.10064	1.25682	1.00463					146	0.189544	0.218075	0.197552	0.203962
			147	1.13415	1.07385	1.10423	1.25501	1.00546					147	0.19587	0.222502	0.195118	0.204964
			148	1.13513	1.07433	1.10292	1.25835	1.00642					148	0.198926	0.212534	0.209406	0.214385
			149	1.13587	1.08368	1.1007	1.25762	1.00637					149	0.192406	0.222234	0.197273	0.238429
			150	1.13675	1.07572	1.10247	1.25838	1.00676					150	0.197276	0.207539	0.216115	0.202634
			151	1.13652	1.07554	1.10191	1.25943	1.01129					151	0.189809	0.220758	0.195199	0.218721
			152	1.13574	1.07394	1.10428	1.25937	1.00448					152	0.192763	0.206807	0.195767	0.207358
			153	1.13664	1.07632	1.10222	1.25765	1.00704					153	0.183361	0.212555	0.246279	0.204359
			154	1.13688	1.07349	1.10463	1.25971	1.00544					154	0.203306	0.209459	0.200785	0.204729
			155	1.13704	1.07218	1.10223	1.25982	1.01033					155	0.192865	0.219665	0.19659	0.21415
			156	1.13823	1.07214	1.10288	1.26067	1.00836					156	0.197622	0.207333	0.201086	0.204865
			157	1.13563	1.0711	1.10367	1.25852	1.00885					157	0.194159	0.224174	0.197123	0.226669
			158	1.13092	1.05949	1.10015	1.25907	1.00503					158	0.198386	0.214618	0.201144	0.204756
			159	1.12653	1.04498	1.09663	1.24982	1.00045					159	0.191744	0.212039	0.21002	0.206427
			160	1.15239	1.08227	1.11301	1.27735	0.997891					160	0.194627	0.206415	0.20593	0.204964
			161	1.16443	1.08925	1.12241	1.29967	1.00187					161	0.200525	0.226217	0.216672	0.207376
			162	1.167	1.09237	1.12498	1.30903	1.00017					162	0.184502	0.222853	0.201457	0.205452
			163	1.17028	1.09582	1.12732	1.31158	0.999976					163	0.192142	0.219479	0.201746	0.21611
			164	1.16922	1.09264	1.12918	1.3118	1.00144					164	0.184094	0.225701	0.230821	0.206084
			165	1.16939	1.09092	1.13124	1.31085	0.999883					165	0.196868	0.223049	0.195813	0.207403
			166	1.16929	1.09572	1.12933	1.31167	1.00104					166	0.183493	0.22113	0.212361	0.207439
			167	1.17016	1.09525	1.13	1.31059	1.00397					167	0.191622	0.223792	0.192256	0.215948
			168	1.1711	1.09269	1.13244	1.311	1.00103					168	0.191255	0.210047	0.198131	0.230074
			169	1.16891	1.09081	1.13197	1.31195	1.00663					169	0.187537	0.221378	0.231365	0.206735
			170	1.16974	1.09325	1.12982	1.31267	0.999128					170	0.194006	0.212709	0.19783	0.208171
			171	1.17042	1.09577	1.1305	1.31267	1.00305					171	0.200576	0.211987	0.219499	0.213256
			172	1.17285	1.09914	1.13093	1.31076	1.00085					172	0.196756	0.206425	0.196601	0.207313
			173	1.17137	1.0951	1.13088	1.31224	1.00499					173	0.191704	0.224422	0.195361	0.205443
			174	1.17221	1.10198	1.13209	1.31479	1.00493					174	0.203153	0.21662	0.195582	0.205055
			175	1.17115	1.09444	1.12928	1.31266	1.0037					175	0.186518	0.2082	0.199846	0.203862
			176	1.17217	1.09365	1.13264	1.31433	1.00592					176	0.201574	0.225546	0.204609	0.21929
			177	1.17085	1.0911	1.13134	1.31364	1.00144					177	0.20136	0.218375	0.199371	0.223309
			178	1.16356	1.07676	1.12985	1.30875	1.00466					178	0.192529	0.220119	0.196161	0.205705
			179	1.15785	1.07117	1.12428	1.30829	0.994457					179	0.1904	0.223111	0.196972	0.217745
			180	1.17818	1.09875	1.13603	1.33839	0.993635					180	0.19861	0.225278	0.196775	0.208117
			181	1.18777	1.10753	1.14469	1.3489	0.995262					181	0.197388	0.212359	0.197749	0.20846
			182	1.18813	1.10813	1.14858	1.35425	0.994889					182	0.203439	0.226733	0.225965	0.221656
			183	1.19422	1.11616	1.15148	1.35851	0.999282					183	0.183646	0.209851	0.197436	0.209074
			184	1.19394	1.11398	1.14908	1.35678	1.00046					184	0.183962	0.214866	0.220867	0.213536
			185	1.19408	1.11189	1.15608	1.35831	0.995694					185	0.18498	0.208644	0.193751	0.213437
			186	1.19359	1.11264	1.15051	1.35801	1.00207					186	0.201819	0.223163	0.211341	0.21322
			187	1.19491	1.11523	1.151	1.35949	0.99729					187	0.196471	0.21402	0.19681	0.221647
			188	1.19596	1.11489	1.15067	1.35961	0.997202					188	0.189748	0.223503	0.211538	0.207855
			189	1.19292	1.11646	1.15129	1.35772	0.997535					189	0.196501	0.209583	0.199521	0.212326
			190	1.19427	1.11577	1.15193	1.3593	0.997202					190	0.189727	0.220067	0.19907	0.220094
			191	1.19542	1.11641	1.15131	1.35696	0.998149					191	0.196939	0.216961	0.199174	0.217321
			192	1.19448	1.11026	1.15346	1.35833	0.997507					192	0.20133	0.220459	0.196393	0.210348
			193	1.1956	1.1124	1.15071	1.36098	1.00125					193	0.194515	0.208489	0.195431	0.231827
			194	1.19559	1.10997	1.15038	1.35962	0.998643					194	0.199058	0.211533	0.203091	0.218233
			195	1.19502	1.11042	1.15442	1.35886	1.00012					195	0.194546	0.213556	0.198513	0.208189
			196	1.19596	1.11208	1.15069	1.36041	0.99718					196	0.195524	0.219644	0.206243	0.21714
			197	1.19696	1.10961	1.15225	1.35873	0.999064					197	0.192498	0.222554	0.204446	0.211621
			198	1.19175	1.09513	1.1525	1.35465	0.99659					198	0.189198	0.220934	0.198316	0.214349
			199	1.18298	1.07935	1.14683	1.35284	0.992508					199	0.198895	0.214969	0.210762	0.210799
			200	1.20421	1.11108	1.14913	1.37837	0.991088					200	0.194963	0.216218	0.197598	0.210248
			201	1.21283	1.12501	1.1668	1.39014	0.996619					201	0.194036	0.224587	0.202395	0.210492
			202	1.21325	1.12367	1.16489	1.38976	0.991135					202	0.195788	0.21661	0.199012	0.208406
			203	1.21802	1.12473	1.16949	1.39546	0.992395					203	0.183829	0.21177	0.19725	0.233868
			204	1.21987	1.12666	1.16757	1.39497	0.992129					204	0.185765	0.20756	0.194886	0.231474
			205	1.2175	1.12666	1.16919	1.39716	0.995373					205	0.193364	0.223472	0.19608	0.228105
			206	1.21747	1.12108	1.16944	1.39809	0.992206					206	0.191622	0.224783	0.211133	0.210402
			207	1.21782	1.12301	1.16942	1.43679	0.993183					207	0.196216	0.211657	0.195002	0.210366
			208	1.21741	1.12501	1.17015	1.39968	0.995099					208	0.202563	0.222017	0.207934	0.210402
			209	1.21652	1.12312	1.16893	1.39746	0.99354					209	0.186926	0.213153	0.196833	0.213446
			210	1.22041	1.12321	1.17461	1.39781	0.994848					210	0.199079	0.223906	0.216556	0.209607
			211	1.21973	1.12589	1.16982	1.39834	0.994336					211	0.200749	0.218849	0.200112	0.215333
			212	1.22107	1.12798	1.16784	1.40074	0.9941					212	0.186427	0.207498	0.200761	0.209778
			213	1.22091	1.12585	1.16973	1.39891	0.991562					213	0.189452	0.220449	0.199904	0.209598
			214	1.22024	1.12843	1.1697	1.4099	0.994627					214	0.194637	0.2108	0.194805	0.211431
			215	1.21934	1.12567	1.17412	1.39972	0.994449					215	0.188525	0.224607	0.198803	0.21369
			216	1.22063	1.12147	1.17134	1.40195	0.998598					216	0.192559	0.224576	0.196509	0.209544
			217	1.22196	1.12111	1.17183	1.40329	0.995142					217	0.196868	0.225577	0.199672	0.21023
			218	1.21259	1.11422	1.17079	1.39627	0.993794					218	0.197887	0.225825	0.23308	0.217989
			219	1.20888	1.09268	1.16554	1.42132	0.987041					219	0.188097	0.218777	0.19725	0.212208
			220	1.22287	1.122	1.16925	1.40721	0.986232					220	0.185724	0.212668	0.204921	0.218441
			221	1.22876	1.12967	1.17895	1.43028	0.987826					221	0.199435	0.208117	0.200634	0.225856
			222	1.23306	1.13588	1.18175	1.43913	0.989274					222	0.198345	0.220418	0.200379	0.210844
			223	1.23583	1.13946	1.18671	1.43609	0.989179					223	0.196573	0.224896	0.212662	0.212118
			224	1.23702	1.13795	1.18464	1.42829	0.986806					224	0.201157	0.217033	0.198734	0.209806
			225	1.23501	1.13709	1.18761	1.44017	0.988748					225	0.201911	0.22112	0.196903	0.225477
			226	1.23433	1.14005	1.1837	1.43469	0.988455					226	0.197897	0.216435	0.198015	0.227979
			227	1.23727	1.13712	1.18304	1.45546	0.988215					227	0.202155	0.224339	0.201874	0.213229
			228	1.23659	1.14372	1.18603	1.43774	0.989539					228	0.18608	0.218364	0.199093	0.207222
			229	1.23667	1.13738	1.18353	1.4281	0.987901					229	0.186193	0.220841	0.196833	0.215216
			230	1.23651	1.13898	1.18229	1.42973	0.996071					230	0.193873	0.222967	0.196764	0.210058
			231	1.23696	1.13994	1.18613	1.43683	0.988269					231	0.186417	0.207932	0.213462	0.208731
			232	1.23966	1.14003	1.18358	1.43086	0.99078					232	0.20022	0.225897	0.19725	0.211603
			233	1.23793	1.13564	1.18407	1.42906	0.988463					233	0.194586	0.21919	0.196764	0.22171
			234	1.23541	1.13656	1.18498	1.43815	0.990366					234	0.192916	0.218829	0.204203	0.210492
			235	1.23901	1.13571	1.18659	1.42682	0.987983					235	0.198732	0.213143	0.19389	0.209977
			236	1.23937	1.13466	1.18612	1.4265	0.992951					236	0.198427	0.221089	0.196706	0.211766
			237	1.24012	1.13203	1.1847	1.427	0.988319					237	0.202868	0.212709	0.198791	0.209471
			238	1.22979	1.10997	1.18512	1.42403	0.986679					238	0.193007	0.210057	0.196648	0.213048
			239	1.22602	1.11546	1.17768	1.4163	0.989598					239	0.199802	0.209067	0.202094	0.223327
			240	1.24299	1.13476	1.18347	1.43673	0.986682					240	0.191408	0.212245	0.22943	0.212425
			241	1.24976	1.14175	1.19128	1.45274	0.982089					241	0.197622	0.219716	0.196706	0.211151
			242	1.25347	1.14462	1.19589	1.44831	0.982173					242	0.186386	0.219396	0.215119	0.212326
			243	1.25053	1.14551	1.19473	1.45243	0.983074					243	0.199832	0.208004	0.203044	0.213139
			244	1.25315	1.1475	1.19384	1.45245	0.982714					244	0.189799	0.214041	0.198977	0.21294
			245	1.25539	1.14536	1.19821	1.45275	0.981907					245	0.192091	0.208138	0.194284	0.22479
			246	1.25224	1.14681	1.2024	1.45241	0.986553					246	0.187537	0.208675	0.232721	0.225251
			247	1.25392	1.15027	1.19591	1.45589	0.987003					247	0.19152	0.208303	0.195825	0.210167
			248	1.25693	1.14614	1.19502	1.45288	0.984415					248	0.186131	0.214866	0.195315	0.229514
			249	1.25366	1.14678	1.19655	1.45414	0.984482					249	0.199303	0.208767	0.200646	0.208604
			250	1.25488	1.15012	1.19654	1.45259	0.98381					250	0.185184	0.215527	0.195802	0.217013
			251	1.25281	1.14498	1.19624	1.45416	0.985784					251	0.197418	0.21821	0.196856	0.213897
			252	1.25334	1.14828	1.19937	1.45483	0.983788					252	0.183717	0.216971	0.21126	0.222857
			253	1.25448	1.14366	1.19623	1.46297	0.986538					253	0.193252	0.216837	0.196509	0.213084
			254	1.25224	1.14966	1.19816	1.47249	0.983788					254	0.197602	0.21436	0.198224	0.215595
			255	1.25528	1.14378	1.19598	1.46824	0.986297					255	0.198936	0.219262	0.226035	0.226642
			256	1.25323	1.14766	1.19656	1.45745	0.985124					256	0.189249	0.217921	0.200599	0.210393
			257	1.25114	1.14454	1.19572	1.45431	0.988419					257	0.187924	0.211843	0.194481	0.21425
			258	1.24373	1.12698	1.19709	1.4689	0.983803					258	0.191276	0.207694	0.196659	0.209778
			259	1.23914	1.11886	1.18899	1.44859	0.982442					259	0.185979	0.219572	0.200356	0.223959
			260	1.25132	1.14577	1.19196	1.45999	0.975177					260	0.196175	0.215981	0.202859	0.209905
			261	1.25777	1.14899	1.20276	1.46793	0.98196					261	0.197052	0.216878	0.204887	0.219741
			262	1.25893	1.14913	1.20863	1.475	0.976321					262	0.197907	0.226733	0.197841	0.212244
			263	1.26197	1.15531	1.20416	1.47873	0.978758					263	0.200647	0.221759	0.20163	0.209092
			264	1.26097	1.152	1.20563	1.47574	0.979723					264	0.189055	0.211822	0.200275	0.214015
			265	1.26261	1.15123	1.20408	1.47543	0.979287					265	0.186569	0.22212	0.199568	0.215117
			266	1.26413	1.15267	1.2067	1.47504	0.979641					266	0.194709	0.213906	0.196474	0.209227
			267	1.26564	1.1533	1.20476	1.48486	0.979522					267	0.193619	0.21014	0.196601	0.208469
			268	1.2636	1.15412	1.20419	1.47712	0.98344					268	0.188607	0.217477	0.206544	0.243659
			269	1.2624	1.1513	1.20325	1.47689	0.980797					269	0.193904	0.215248	0.199985	0.212985
			270	1.26177	1.1513	1.20438	1.47402	0.979899					270	0.186325	0.20691	0.200947	0.230969
			271	1.26395	1.15231	1.20636	1.47702	0.981233					271	0.192518	0.211719	0.198293	0.248455
			272	1.26352	1.15525	1.2048	1.47613	0.979383					272	0.195799	0.21209	0.199661	0.211296
			273	1.26469	1.15429	1.20392	1.47416	0.982355					273	0.193425	0.211564	0.19995	0.226651
			274	1.26454	1.15529	1.20632	1.47686	0.979411					274	0.190919	0.21563	0.19922	0.213717
			275	1.2667	1.15313	1.20476	1.47465	0.980802					275	0.191184	0.215238	0.197841	0.240435
			276	1.26498	1.16249	1.20489	1.47533	0.981535					276	0.199822	0.222533	0.199012	0.214701
			277	1.26367	1.14971	1.20877	1.47675	0.981127					277	0.198671	0.222698	0.197366	0.211621
			278	1.25848	1.13462	1.20091	1.47352	0.979409					278	0.198681	0.226568	0.236209	0.210257
			279	1.25133	1.12712	1.1975	1.46591	0.977238					279	0.18771	0.211698	0.198189	0.211621
			280	1.2672	1.15198	1.2084	1.48064	0.97286					280	0.193527	0.215403	0.202975	0.2233
			281	1.27018	1.1583	1.21223	1.4864	0.974142					281	0.186641	0.21533	0.196949	0.212795
			282	1.27183	1.16055	1.21121	1.48982	0.9752					282	0.203194	0.219035	0.1963	0.217673
			283	1.27188	1.16248	1.21271	1.49061	0.973335					283	0.197235	0.21336	0.198849	0.214132
			284	1.27656	1.16819	1.20974	1.49407	0.980119					284	0.192264	0.222802	0.199742	0.221765
			285	1.27324	1.16287	1.21217	1.49205	0.973939					285	0.190501	0.223978	0.201781	0.212028
			286	1.27722	1.16383	1.21259	1.49319	0.977745					286	0.202349	0.218271	0.198073	0.210158
			287	1.27684	1.16351	1.21172	1.4946	0.97367					287	0.193313	0.225598	0.197227	0.22713
			288	1.27426	1.16384	1.21232	1.49342	0.975209					288	0.18607	0.209283	0.262108	0.214015
			289	1.27524	1.16208	1.20831	1.49731	0.979177					289	0.193639	0.212874	0.200147	0.212696
			290	1.27615	1.1657	1.21046	1.49292	0.975248					290	0.199812	0.219995	0.202082	0.229433
			291	1.27762	1.16632	1.20982	1.4947	0.976368					291	0.194444	0.222471	0.198965	0.214448
			292	1.27667	1.16826	1.2123	1.4924	0.976622					292	0.194984	0.216177	0.201654	0.22115
			293	1.27429	1.16391	1.21111	1.4954	0.975063					293	0.185225	0.209222	0.203879	0.221954
			294	1.2793	1.16149	1.21154	1.49382	0.97582					294	0.185306	0.213556	0.199521	0.210889
			295	1.27651	1.16284	1.2103	1.49129	0.974379					295	0.192793	0.218509	0.199869	0.211729
			296	1.27747	1.16476	1.20913	1.49273	0.980843					296	0.185642	0.222337	0.219905	0.213662
			297	1.27524	1.15835	1.21352	1.49177	0.976315					297	0.201035	0.218664	0.201468	0.211224
			298	1.26886	1.13939	1.20868	1.48617	0.976305					298	0.19752	0.212482	0.227761	0.209652
			299	1.26096	1.13033	1.20363	1.4861	0.969081					299	0.188291	0.208128	0.195755	0.214132
			300	1.27662	1.1591	1.20753	1.50019	0.970002					300	0.193384	0.207849	0.201132	0.21434
			301	1.28049	1.1646	1.2165	1.5044	0.969147					301	0.185113	0.213473	0.20002	0.215243
			302	1.28471	1.16691	1.21374	1.50665	0.974295					302	0.188352	0.214247	0.196694	0.217077
			303	1.28282	1.16728	1.21535	1.50834	0.972651					303	0.18767	0.20658	0.211445	0.21434
			304	1.28372	1.17415	1.21592	1.50732	0.969317					304	0.190135	0.214133	0.200275	0.211946
			305	1.28571	1.16846	1.21533	1.51042	0.972199					305	0.201432	0.2192	0.198699	0.236262
			306	1.28808	1.16805	1.22158	1.50924	0.971658					306	0.189259	0.208086	0.211585	0.212443
			307	1.28522	1.1685	1.21778	1.51115	0.973001					307	0.199751	0.219138	0.197598	0.214132
			308	1.28375	1.16829	1.21805	1.50963	0.970825					308	0.191785	0.216899	0.199394	0.230246
			309	1.2851	1.16962	1.21679	1.51105	0.971622					309	0.190318	0.211347	0.201642	0.216246
			310	1.28612	1.17188	1.21903	1.51013	0.969234					310	0.191591	0.209356	0.196706	0.218459
			311	1.28684	1.16956	1.21484	1.51134	0.972918					311	0.184033	0.226475	0.203183	0.211531
			312	1.28366	1.16997	1.21819	1.51083	0.97681					312	0.202797	0.206972	0.200228	0.228801
			313	1.28776	1.16752	1.21986	1.51038	0.969545					313	0.201085	0.216507	0.199336	0.234193
			314	1.28636	1.17206	1.21562	1.51007	0.97539					314	0.185826	0.209397	0.200031	0.211034
			315	1.28702	1.17229	1.21492	1.51179	0.973778					315	0.196369	0.207251	0.198455	0.212443
			316	1.28617	1.16821	1.21603	1.51048	0.973962					316	0.198111	0.212235	0.1998	0.21565
			317	1.28642	1.16732	1.21902	1.51343	0.97016					317	0.18935	0.21887	0.210634	0.211034
			318	1.27714	1.15795	1.21551	1.50931	0.969522					318	0.202135	0.22567	0.20491	0.21621
			319	1.26701	1.13939	1.21264	1.50186	0.966006					319	0.184664	0.207385	0.196057	0.212642
			320	1.28531	1.16857	1.21468	1.51202	0.961719					320	0.20133	0.225918	0.219661	0.219145
			321	1.29247	1.17505	1.21707	1.52226	0.965004					321	0.203357	0.222667	0.199209	0.212678
			322	1.29211	1.17901	1.22014	1.52322	0.964764					322	0.185021	0.219737	0.19995	0.213897
			323	1.29102	1.17937	1.22915	1.52523	0.969846					323	0.202196	0.223328	0.200854	0.21789
			324	1.29332	1.1779	1.22141	1.52882	0.965757					324	0.199547	0.209056	0.196509	0.233516
			325	1.29322	1.17872	1.22257	1.52699	0.967536					325	0.19914	0.22437	0.220507	0.22909
			326	1.29019	1.17803	1.22414	1.52839	0.965835					326	0.19424	0.221254	0.203357	0.235404
			327	1.29376	1.1752	1.2226	1.5281	0.963501					327	0.190542	0.21274	0.198618	0.213491
			328	1.29415	1.17525	1.22557	1.52336	0.964981					328	0.202939	0.215898	0.201665	0.212913
			329	1.29461	1.18418	1.22201	1.52655	0.964933					329	0.197021	0.220335	0.199649	0.218784
			330	1.29339	1.17895	1.22357	1.52552	0.969337					330	0.185938	0.226186	0.19827	0.212154
			331	1.29259	1.17825	1.22116	1.52596	0.96517					331	0.197337	0.21241	0.2009	0.212651
			332	1.29432	1.17878	1.22262	1.52605	0.967714					332	0.189524	0.206879	0.214111	0.222812
			333	1.29633	1.1823	1.22338	1.5262	0.972674					333	0.187374	0.216734	0.199104	0.218856
			334	1.29707	1.17961	1.2215	1.52818	0.967223					334	0.201248	0.207271	0.198873	0.224655
			335	1.29548	1.1743	1.22549	1.52729	0.966058					335	0.20132	0.207839	0.200495	0.211919
			336	1.29593	1.17749	1.22349	1.52553	0.965058					336	0.194189	0.221532	0.227089	0.209038
			337	1.29394	1.17139	1.22345	1.52506	0.971276					337	0.194383	0.213205	0.203357	0.217375
			338	1.28976	1.15608	1.22204	1.52098	0.968535					338	0.192019	0.209304	0.19805	0.209571
			339	1.27969	1.14938	1.21731	1.51846	0.963694					339	0.18822	0.223348	0.205118	0.211982
			340	1.29483	1.17272	1.22844	1.53162	0.96309					340	0.199782	0.216713	0.198838	0.223887
			341	1.2979	1.17595	1.24861	1.53396	0.956389					341	0.194271	0.22469	0.220218	0.220536
			342	1.29825	1.18273	1.23967	1.53448	0.95882					342	0.19858	0.214845	0.195813	0.218757
			343	1.29833	1.18462	1.24146	1.53565	0.959538					343	0.201462	0.221605	0.199591	0.211802
			344	1.29872	1.18304	1.24177	1.53462	0.962639					344	0.202909	0.21921	0.200924	0.211169
			345	1.29912	1.18384	1.24016	1.53919	0.959302					345	0.190827	0.2069	0.20287	0.213012
			346	1.2978	1.18054	1.24463	1.53577	0.961446					346	0.185133	0.212895	0.240508	0.213482
			347	1.3019	1.18408	1.24703	1.53774	0.95853					347	0.196807	0.2208	0.197204	0.210077
			348	1.30084	1.18129	1.24503	1.53724	0.959555					348	0.196878	0.211162	0.201237	0.225405
			349	1.30047	1.18064	1.24232	1.53564	0.966278					349	0.197398	0.225082	0.206138	0.213048
			350	1.30109	1.18038	1.24329	1.53777	0.96023					350	0.192956	0.226991	0.206046	0.217447
			351	1.30055	1.18003	1.24048	1.53667	0.965094					351	0.202277	0.217931	0.234471	0.215631
			352	1.30134	1.1896	1.24374	1.5357	0.96313					352	0.197388	0.207106	0.20097	0.214304
			353	1.3047	1.1789	1.24529	1.53608	0.960809					353	0.194454	0.221068	0.205014	0.216842
			354	1.30252	1.17906	1.2432	1.53584	0.958841					354	0.19695	0.221491	0.203879	0.212633
			355	1.30115	1.17804	1.24366	1.53811	0.962731					355	0.203663	0.226093	0.19827	0.219642
			356	1.30447	1.18167	1.24419	1.53577	0.959829					356	0.203204	0.218942	0.209974	0.214773
			357	1.3018	1.18532	1.2433	1.53594	0.962111					357	0.189911	0.223823	0.199579	0.212335
			358	1.29293	1.1672	1.24035	1.53483	0.960011					358	0.202899	0.215671	0.196532	0.210492
			359	1.28698	1.14675	1.23612	1.52568	0.95886					359	0.201605	0.216517	0.200495	0.21266
			360	1.29861	1.17786	1.24149	1.53282	0.95752					360	0.188393	0.220727	0.212512	0.212579
			361	1.30188	1.18092	1.24492	1.54277	0.956172					361	0.189737	0.222575	0.199858	0.234699
			362	1.30203	1.18852	1.25013	1.54341	0.958214					362	0.203174	0.21789	0.200634	0.211278
			363	1.30525	1.18641	1.24788	1.54712	0.956845					363	0.200006	0.217219	0.200854	0.224059
			364	1.3053	1.18479	1.24738	1.54479	0.958426					364	0.199568	0.223844	0.199197	0.213942
			365	1.3062	1.18728	1.2502	1.5455	0.956519					365	0.187364	0.206508	0.201503	0.215857
			366	1.30671	1.19274	1.25371	1.54381	0.955526					366	0.195962	0.221852	0.203044	0.209119
			367	1.30951	1.1901	1.25009	1.54634	0.956337					367	0.190277	0.207343	0.203137	0.213617
			368	1.30685	1.19058	1.24965	1.54485	0.956238					368	0.190817	0.213194	0.199267	0.21303
			369	1.30556	1.18959	1.24964	1.54675	0.956673					369	0.183676	0.216569	0.199093	0.243325
			370	1.30628	1.19328	1.24881	1.54588	0.954985					370	0.187527	0.221553	0.201526	0.212109
			371	1.30775	1.1899	1.24942	1.5483	0.956485					371	0.189727	0.219603	0.201688	0.210998
			372	1.30771	1.19348	1.24966	1.5454	0.958956					372	0.190094	0.206982	0.202963	0.210898
			373	1.30774	1.18949	1.25215	1.54592	0.954197					373	0.185734	0.211966	0.203102	0.228042
			374	1.3087	1.18679	1.25085	1.54471	0.957414					374	0.195024	0.221408	0.1963	0.213735
			375	1.30969	1.19118	1.25064	1.54629	0.9576					375	0.185867	0.213721	0.199174	0.212714
			376	1.30704	1.19386	1.25209	1.54582	0.957118					376	0.195299	0.211275	0.198791	0.210853
			377	1.30624	1.19139	1.25552	1.54755	0.955896					377	0.191001	0.219241	0.200333	0.219985
			378	1.30876	1.19969	1.25217	1.5495	0.955897					378	0.188383	0.209479	0.200866	0.211693
			379	1.31099	1.1923	1.25133	1.54752	0.958502					379	0.194301	0.21111	0.196694	0.211603
			380	1.30902	1.19228	1.25102	1.54557	0.956615					380	0.194749	0.22081	0.198907	0.212886
