# Supplementary material for: Structure-activity relationships of mitochondria-targeted tetrapeptide pharmacological compounds
Source: eLife. 2022 Aug 1;11:e75531. doi: 10.7554/eLife.75531 (PMC9342957; doi:10.7554/eLife.75531)
Supplement: Figure 5—source data 1. [file elife-75531-fig5-data1.xlsx]

## Sheet: ANS Mitoplasts
Fig. 5A		ANS time	Time (s)	SS-31	SPN4	SS-20	SPN 10	Neg Cont		ANS fract	[Pep] (mM)	SS-31 q Avg	SS-31 q SD	SPN4 q Avg	SPN4 q SD	SS-20 q Avg	SS-20 q SD	SPN10 q Avg	SPN10 q SD
1,8-ANS		course data	0	0.24519	0.2077	0.251728	0.275725	0.243		saturation	0	0	0	0	0	0	0	0	0
Measurements			1	0.243609	0.207894	0.251483	0.275349	0.242613			4.97512	0.267788	0.0138984	0.217064	0.0176965	0.230238	0.0413684	0.30186	0.0065766
(ys assay)			2	0.245492	0.208916	0.250992	0.275056	0.246665			9.90099	0.423779	0.0128959	0.374732	0.00599399	0.382387	0.0634205	0.46794	0.00208144
Mitoplasts			3	0.245503	0.208865	0.252217	0.274949	0.244763			14.7783	0.540071	0.00959931	0.478992	0.0259455	0.504669	0.0897886	0.567439	0.0171018
			4	0.243715	0.208699	0.251893	0.27495	0.241794			19.6078	0.621423	0.00666574	0.578928	0.0232971	0.594901	0.09994	0.653849	0.0227834
			5	0.243749	0.209488	0.250263	0.27335	0.242737			24.3902	0.702851	0.00907355	0.64354	0.0235822	0.672991	0.111387	0.735225	0.0446444
			6	0.244002	0.209989	0.253981	0.273807	0.249657			29.1262	0.762998	0.0278385	0.716518	0.0285391	0.734677	0.119862	0.794507	0.0463689
			7	0.243144	0.207686	0.252721	0.273226	0.244368			33.8164	0.820954	0.0267496	0.762857	0.0401201	0.788076	0.121305	0.836177	0.0305978
			8	0.242083	0.208521	0.249885	0.274286	0.244582			38.4615	0.853657	0.00838676	0.796437	0.0229782	0.818439	0.11347	0.871564	0.0184142
			9	0.247953	0.212241	0.251701	0.274771	0.242251			43.0622	0.894512	0.00446865	0.856046	0.0259796	0.844255	0.104648	0.90342	0.0139971
			10	0.245533	0.207035	0.251056	0.272425	0.242157			47.619	0.927601	0.00322214	0.886248	0.0357873	0.870959	0.0974726	0.934545	0.0119635
			11	0.243726	0.211864	0.24982	0.273348	0.24204			52.1327	0.954977	0.00180837	0.9355	0.0155126	0.895639	0.102827	0.964148	0.0151798
			12	0.241664	0.206598	0.249462	0.27241	0.243284			56.6038	0.9783	0.00118987	0.951422	0.0080317	0.9715	0.0106439	0.983324	0.00816202
			13	0.24131	0.206633	0.250271	0.272313	0.242064			61.0329	1	0	1	0	1	0	1	0
			14	0.244281	0.207293	0.250077	0.271698	0.243007
			15	0.241562	0.20653	0.24978	0.272286	0.242414
			16	0.242631	0.209421	0.248905	0.272169	0.242391
			17	0.241198	0.207032	0.24899	0.271086	0.247774
			18	0.240704	0.206825	0.250057	0.272089	0.241411
			19	0.240092	0.207444	0.249056	0.271039	0.241719
			20	0.240087	0.207592	0.249198	0.271	0.241146
			21	0.23982	0.209119	0.254903	0.27124	0.241124
			22	0.239911	0.207866	0.249789	0.271334	0.240833
			23	0.241328	0.207353	0.249986	0.271078	0.243603
			24	0.238432	0.208409	0.249035	0.270483	0.24395
			25	0.238515	0.207206	0.249258	0.270971	0.242152
			26	0.240149	0.207716	0.249532	0.270786	0.247042
			27	0.23931	0.210859	0.248329	0.270158	0.241014
			28	0.239545	0.207537	0.24913	0.269596	0.240883
			29	0.23901	0.208573	0.248444	0.269821	0.245463
			30	0.239735	0.207077	0.252681	0.270014	0.241488
			31	0.239811	0.211997	0.248596	0.270804	0.239494
			32	0.244845	0.208347	0.248845	0.269543	0.240877
			33	0.238357	0.208499	0.248446	0.269427	0.243252
			34	0.238819	0.207131	0.2522	0.269538	0.241408
			35	0.238544	0.206704	0.249221	0.269339	0.239573
			36	0.237243	0.207234	0.248646	0.268508	0.24029
			37	0.240339	0.207296	0.248464	0.268858	0.239769
			38	0.240007	0.210729	0.248772	0.269052	0.240081
			39	0.238142	0.207111	0.247525	0.268957	0.240124
			40	0.23691	0.207029	0.25177	0.270778	0.239812
			41	0.236793	0.205911	0.247699	0.268189	0.239763
			42	0.238094	0.207802	0.250534	0.268692	0.242019
			43	0.237411	0.206396	0.248481	0.268455	0.238545
			44	0.237793	0.205794	0.246663	0.269228	0.238682
			45	0.237283	0.206875	0.248971	0.269636	0.245275
			46	0.237339	0.205589	0.24666	0.268205	0.238704
			47	0.237487	0.204147	0.246873	0.267293	0.244341
			48	0.238655	0.204766	0.247449	0.26828	0.238947
			49	0.235311	0.204606	0.246042	0.266567	0.238937
			50	0.237886	0.204932	0.246833	0.267829	0.246777
			51	0.242131	0.207311	0.246714	0.267831	0.244209
			52	0.236281	0.204655	0.245824	0.267404	0.23893
			53	0.23655	0.205401	0.247132	0.267968	0.238756
			54	0.236791	0.203972	0.247509	0.267355	0.23905
			55	0.238724	0.205245	0.246678	0.266849	0.239942
			56	0.235979	0.204375	0.246335	0.267498	0.238474
			57	0.241473	0.205398	0.246066	0.266584	0.242346
			58	0.235065	0.203964	0.247135	0.267408	0.238582
			59	0.374985	0.391035	0.249071	0.319484	0.316475
			60	0.841325	0.880351	0.665404	0.778778	0.779756
			61	0.895413	0.946835	0.857764	0.895667	0.888454
			62	0.946537	0.979018	0.940284	0.957463	0.945044
			63	0.96861	0.989425	0.962497	0.985388	0.964154
			64	0.981237	0.994208	0.981533	0.992261	0.980575
			65	0.988783	1.00146	0.98527	0.997834	0.981905
			66	0.991416	1.00231	0.991969	1.00007	0.988601
			67	0.994842	1.00329	0.995376	1.00513	0.990805
			68	0.99838	1.00248	0.997447	1.00677	0.993504
			69	0.999742	1.00637	0.999605	1.0085	0.995492
			70	0.999075	1.00242	1.0057	1.0081	0.9997
			71	0.999809	1.00579	1.00816	1.00815	0.998917
			72	1.00122	1.00534	1.00765	1.00963	1.00265
			73	1.00156	1.00542	1.00578	1.00879	1.00574
			74	1.00227	1.00512	1.00612	1.00994	1.00211
			75	1.00328	1.00382	1.00709	1.00745	1.00284
			76	1.00353	1.01205	1.0095	1.00823	1.00532
			77	1.0043	1.00587	1.00715	1.00857	1.00437
			78	1.00451	1.00152	1.00797	1.00845	1.00529
			79	1.00415	0.998376	1.01104	1.00853	1.00531
			80	1.00726	0.994729	1.00906	1.00801	1.01491
			81	1.00506	1.00399	1.01545	1.00811	1.00911
			82	1.00475	0.99569	1.01068	1.00871	1.00893
			83	1.00523	0.992584	1.01125	1.00571	1.00663
			84	1.00617	0.995094	1.01025	1.00683	1.00989
			85	1.00559	0.997992	1.01165	1.0059	1.00722
			86	1.00663	1.00001	1.01263	1.0056	1.01131
			87	1.00596	1.00183	1.01193	1.00603	1.009
			88	1.00763	1.01074	1.01423	1.0067	1.00847
			89	1.01109	1.00583	1.01272	1.0048	1.00719
			90	1.00815	1.01124	1.01251	1.00818	1.01085
			91	1.00772	1.00654	1.00888	1.00672	1.00903
			92	1.00739	1.00332	1.01263	1.00805	1.01111
			93	1.00725	1.00451	1.01144	1.00668	1.00906
			94	1.00948	1.01029	1.01336	1.00517	1.00848
			95	1.00735	1.00915	1.01248	1.00612	1.00728
			96	1.00816	1.00462	1.01322	1.00672	1.01007
			97	1.00918	1.00807	1.01354	1.00519	1.01031
			98	1.00983	1.00449	1.01513	1.00466	1.00914
			99	1.008	1.00397	1.01338	1.00521	1.01131
			100	1.00834	1.0065	1.01356	1.00611	1.01173
			101	1.00749	1.00583	1.01266	1.00695	1.00875
			102	1.01317	1.0051	1.01434	1.00421	1.01445
			103	1.00847	1.00792	1.01234	1.00412	1.01033
			104	1.0085	1.0058	1.01402	1.00531	1.01401
			105	1.00912	1.01256	1.0131	1.00632	1.01152
			106	1.00981	1.00529	1.01277	1.00413	1.01267
			107	1.00971	1.00987	1.01474	1.00376	1.0115
			108	1.01237	1.009	1.01323	1.00541	1.01282
			109	1.01066	1.00762	1.01111	1.00363	1.01134
			110	1.00893	1.00497	1.01344	1.003	1.01942
			111	1.01081	1.00922	1.01406	1.00372	1.01301
			112	1.0097	1.0026	1.01344	1.00307	1.01326
			113	1.0102	1.00128	1.01373	1.00365	1.01635
			114	1.00967	1.00325	1.01573	1.00651	1.01294
			115	1.00928	1.00381	1.01084	1.00481	1.01323
			116	1.0073	1.00095	1.01647	1.0052	1.01544
			117	1.00722	0.997761	1.01316	1.00601	1.01531
			118	1.00387	0.978493	1.01367	1.00144	1.01498
			119	1.00435	0.981136	1.01128	1.00301	1.00996
			120	1.04316	1.02488	1.03256	1.06684	1.00717
			121	1.07533	1.04056	1.05536	1.12744	1.00546
			122	1.08685	1.04656	1.05874	1.15464	1.00727
			123	1.08466	1.04418	1.06108	1.16097	1.00742
			124	1.08595	1.04565	1.06466	1.16336	1.01487
			125	1.08757	1.04521	1.06716	1.16504	1.00757
			126	1.08935	1.04422	1.06333	1.16469	1.00942
			127	1.08881	1.04995	1.06688	1.16566	1.00762
			128	1.088	1.04502	1.07021	1.16632	1.00824
			129	1.09077	1.04459	1.06582	1.16584	1.01083
			130	1.08991	1.04574	1.0637	1.16691	1.01539
			131	1.09071	1.04761	1.07076	1.17169	1.01074
			132	1.08939	1.05199	1.06509	1.16961	1.01188
			133	1.08981	1.04497	1.06826	1.17153	1.00761
			134	1.09049	1.05563	1.06822	1.17191	1.00945
			135	1.08998	1.04268	1.06603	1.17056	1.00935
			136	1.08991	1.04831	1.06568	1.17235	1.00935
			137	1.09037	1.04272	1.06633	1.17237	1.01147
			138	1.08672	1.02857	1.06508	1.17052	1.00923
			139	1.07936	1.02266	1.06297	1.16337	1.00356
			140	1.1061	1.06652	1.07416	1.19237	1.00377
			141	1.12507	1.06998	1.09334	1.2295	1.0024
			142	1.13008	1.07466	1.09806	1.24578	1.00712
			143	1.13275	1.07775	1.1031	1.25041	1.0033
			144	1.13399	1.07488	1.10137	1.25267	1.00465
			145	1.13624	1.0811	1.09947	1.25563	1.00457
			146	1.13487	1.07473	1.10064	1.25682	1.00463
			147	1.13415	1.07385	1.10423	1.25501	1.00546
			148	1.13513	1.07433	1.10292	1.25835	1.00642
			149	1.13587	1.08368	1.1007	1.25762	1.00637
			150	1.13675	1.07572	1.10247	1.25838	1.00676
			151	1.13652	1.07554	1.10191	1.25943	1.01129
			152	1.13574	1.07394	1.10428	1.25937	1.00448
			153	1.13664	1.07632	1.10222	1.25765	1.00704
			154	1.13688	1.07349	1.10463	1.25971	1.00544
			155	1.13704	1.07218	1.10223	1.25982	1.01033
			156	1.13823	1.07214	1.10288	1.26067	1.00836
			157	1.13563	1.0711	1.10367	1.25852	1.00885
			158	1.13092	1.05949	1.10015	1.25907	1.00503
			159	1.12653	1.04498	1.09663	1.24982	1.00045
			160	1.15239	1.08227	1.11301	1.27735	0.997891
			161	1.16443	1.08925	1.12241	1.29967	1.00187
			162	1.167	1.09237	1.12498	1.30903	1.00017
			163	1.17028	1.09582	1.12732	1.31158	0.999976
			164	1.16922	1.09264	1.12918	1.3118	1.00144
			165	1.16939	1.09092	1.13124	1.31085	0.999883
			166	1.16929	1.09572	1.12933	1.31167	1.00104
			167	1.17016	1.09525	1.13	1.31059	1.00397
			168	1.1711	1.09269	1.13244	1.311	1.00103
			169	1.16891	1.09081	1.13197	1.31195	1.00663
			170	1.16974	1.09325	1.12982	1.31267	0.999128
			171	1.17042	1.09577	1.1305	1.31267	1.00305
			172	1.17285	1.09914	1.13093	1.31076	1.00085
			173	1.17137	1.0951	1.13088	1.31224	1.00499
			174	1.17221	1.10198	1.13209	1.31479	1.00493
			175	1.17115	1.09444	1.12928	1.31266	1.0037
			176	1.17217	1.09365	1.13264	1.31433	1.00592
			177	1.17085	1.0911	1.13134	1.31364	1.00144
			178	1.16356	1.07676	1.12985	1.30875	1.00466
			179	1.15785	1.07117	1.12428	1.30829	0.994457
			180	1.17818	1.09875	1.13603	1.33839	0.993635
			181	1.18777	1.10753	1.14469	1.3489	0.995262
			182	1.18813	1.10813	1.14858	1.35425	0.994889
			183	1.19422	1.11616	1.15148	1.35851	0.999282
			184	1.19394	1.11398	1.14908	1.35678	1.00046
			185	1.19408	1.11189	1.15608	1.35831	0.995694
			186	1.19359	1.11264	1.15051	1.35801	1.00207
			187	1.19491	1.11523	1.151	1.35949	0.99729
			188	1.19596	1.11489	1.15067	1.35961	0.997202
			189	1.19292	1.11646	1.15129	1.35772	0.997535
			190	1.19427	1.11577	1.15193	1.3593	0.997202
			191	1.19542	1.11641	1.15131	1.35696	0.998149
			192	1.19448	1.11026	1.15346	1.35833	0.997507
			193	1.1956	1.1124	1.15071	1.36098	1.00125
			194	1.19559	1.10997	1.15038	1.35962	0.998643
			195	1.19502	1.11042	1.15442	1.35886	1.00012
			196	1.19596	1.11208	1.15069	1.36041	0.99718
			197	1.19696	1.10961	1.15225	1.35873	0.999064
			198	1.19175	1.09513	1.1525	1.35465	0.99659
			199	1.18298	1.07935	1.14683	1.35284	0.992508
			200	1.20421	1.11108	1.14913	1.37837	0.991088
			201	1.21283	1.12501	1.1668	1.39014	0.996619
			202	1.21325	1.12367	1.16489	1.38976	0.991135
			203	1.21802	1.12473	1.16949	1.39546	0.992395
			204	1.21987	1.12666	1.16757	1.39497	0.992129
			205	1.2175	1.12666	1.16919	1.39716	0.995373
			206	1.21747	1.12108	1.16944	1.39809	0.992206
			207	1.21782	1.12301	1.16942	1.43679	0.993183
			208	1.21741	1.12501	1.17015	1.39968	0.995099
			209	1.21652	1.12312	1.16893	1.39746	0.99354
			210	1.22041	1.12321	1.17461	1.39781	0.994848
			211	1.21973	1.12589	1.16982	1.39834	0.994336
			212	1.22107	1.12798	1.16784	1.40074	0.9941
			213	1.22091	1.12585	1.16973	1.39891	0.991562
			214	1.22024	1.12843	1.1697	1.4099	0.994627
			215	1.21934	1.12567	1.17412	1.39972	0.994449
			216	1.22063	1.12147	1.17134	1.40195	0.998598
			217	1.22196	1.12111	1.17183	1.40329	0.995142
			218	1.21259	1.11422	1.17079	1.39627	0.993794
			219	1.20888	1.09268	1.16554	1.42132	0.987041
			220	1.22287	1.122	1.16925	1.40721	0.986232
			221	1.22876	1.12967	1.17895	1.43028	0.987826
			222	1.23306	1.13588	1.18175	1.43913	0.989274
			223	1.23583	1.13946	1.18671	1.43609	0.989179
			224	1.23702	1.13795	1.18464	1.42829	0.986806
			225	1.23501	1.13709	1.18761	1.44017	0.988748
			226	1.23433	1.14005	1.1837	1.43469	0.988455
			227	1.23727	1.13712	1.18304	1.45546	0.988215
			228	1.23659	1.14372	1.18603	1.43774	0.989539
			229	1.23667	1.13738	1.18353	1.4281	0.987901
			230	1.23651	1.13898	1.18229	1.42973	0.996071
			231	1.23696	1.13994	1.18613	1.43683	0.988269
			232	1.23966	1.14003	1.18358	1.43086	0.99078
			233	1.23793	1.13564	1.18407	1.42906	0.988463
			234	1.23541	1.13656	1.18498	1.43815	0.990366
			235	1.23901	1.13571	1.18659	1.42682	0.987983
			236	1.23937	1.13466	1.18612	1.4265	0.992951
			237	1.24012	1.13203	1.1847	1.427	0.988319
			238	1.22979	1.10997	1.18512	1.42403	0.986679
			239	1.22602	1.11546	1.17768	1.4163	0.989598
			240	1.24299	1.13476	1.18347	1.43673	0.986682
			241	1.24976	1.14175	1.19128	1.45274	0.982089
			242	1.25347	1.14462	1.19589	1.44831	0.982173
			243	1.25053	1.14551	1.19473	1.45243	0.983074
			244	1.25315	1.1475	1.19384	1.45245	0.982714
			245	1.25539	1.14536	1.19821	1.45275	0.981907
			246	1.25224	1.14681	1.2024	1.45241	0.986553
			247	1.25392	1.15027	1.19591	1.45589	0.987003
			248	1.25693	1.14614	1.19502	1.45288	0.984415
			249	1.25366	1.14678	1.19655	1.45414	0.984482
			250	1.25488	1.15012	1.19654	1.45259	0.98381
			251	1.25281	1.14498	1.19624	1.45416	0.985784
			252	1.25334	1.14828	1.19937	1.45483	0.983788
			253	1.25448	1.14366	1.19623	1.46297	0.986538
			254	1.25224	1.14966	1.19816	1.47249	0.983788
			255	1.25528	1.14378	1.19598	1.46824	0.986297
			256	1.25323	1.14766	1.19656	1.45745	0.985124
			257	1.25114	1.14454	1.19572	1.45431	0.988419
			258	1.24373	1.12698	1.19709	1.4689	0.983803
			259	1.23914	1.11886	1.18899	1.44859	0.982442
			260	1.25132	1.14577	1.19196	1.45999	0.975177
			261	1.25777	1.14899	1.20276	1.46793	0.98196
			262	1.25893	1.14913	1.20863	1.475	0.976321
			263	1.26197	1.15531	1.20416	1.47873	0.978758
			264	1.26097	1.152	1.20563	1.47574	0.979723
			265	1.26261	1.15123	1.20408	1.47543	0.979287
			266	1.26413	1.15267	1.2067	1.47504	0.979641
			267	1.26564	1.1533	1.20476	1.48486	0.979522
			268	1.2636	1.15412	1.20419	1.47712	0.98344
			269	1.2624	1.1513	1.20325	1.47689	0.980797
			270	1.26177	1.1513	1.20438	1.47402	0.979899
			271	1.26395	1.15231	1.20636	1.47702	0.981233
			272	1.26352	1.15525	1.2048	1.47613	0.979383
			273	1.26469	1.15429	1.20392	1.47416	0.982355
			274	1.26454	1.15529	1.20632	1.47686	0.979411
			275	1.2667	1.15313	1.20476	1.47465	0.980802
			276	1.26498	1.16249	1.20489	1.47533	0.981535
			277	1.26367	1.14971	1.20877	1.47675	0.981127
			278	1.25848	1.13462	1.20091	1.47352	0.979409
			279	1.25133	1.12712	1.1975	1.46591	0.977238
			280	1.2672	1.15198	1.2084	1.48064	0.97286
			281	1.27018	1.1583	1.21223	1.4864	0.974142
			282	1.27183	1.16055	1.21121	1.48982	0.9752
			283	1.27188	1.16248	1.21271	1.49061	0.973335
			284	1.27656	1.16819	1.20974	1.49407	0.980119
			285	1.27324	1.16287	1.21217	1.49205	0.973939
			286	1.27722	1.16383	1.21259	1.49319	0.977745
			287	1.27684	1.16351	1.21172	1.4946	0.97367
			288	1.27426	1.16384	1.21232	1.49342	0.975209
			289	1.27524	1.16208	1.20831	1.49731	0.979177
			290	1.27615	1.1657	1.21046	1.49292	0.975248
			291	1.27762	1.16632	1.20982	1.4947	0.976368
			292	1.27667	1.16826	1.2123	1.4924	0.976622
			293	1.27429	1.16391	1.21111	1.4954	0.975063
			294	1.2793	1.16149	1.21154	1.49382	0.97582
			295	1.27651	1.16284	1.2103	1.49129	0.974379
			296	1.27747	1.16476	1.20913	1.49273	0.980843
			297	1.27524	1.15835	1.21352	1.49177	0.976315
			298	1.26886	1.13939	1.20868	1.48617	0.976305
			299	1.26096	1.13033	1.20363	1.4861	0.969081
			300	1.27662	1.1591	1.20753	1.50019	0.970002
			301	1.28049	1.1646	1.2165	1.5044	0.969147
			302	1.28471	1.16691	1.21374	1.50665	0.974295
			303	1.28282	1.16728	1.21535	1.50834	0.972651
			304	1.28372	1.17415	1.21592	1.50732	0.969317
			305	1.28571	1.16846	1.21533	1.51042	0.972199
			306	1.28808	1.16805	1.22158	1.50924	0.971658
			307	1.28522	1.1685	1.21778	1.51115	0.973001
			308	1.28375	1.16829	1.21805	1.50963	0.970825
			309	1.2851	1.16962	1.21679	1.51105	0.971622
			310	1.28612	1.17188	1.21903	1.51013	0.969234
			311	1.28684	1.16956	1.21484	1.51134	0.972918
			312	1.28366	1.16997	1.21819	1.51083	0.97681
			313	1.28776	1.16752	1.21986	1.51038	0.969545
			314	1.28636	1.17206	1.21562	1.51007	0.97539
			315	1.28702	1.17229	1.21492	1.51179	0.973778
			316	1.28617	1.16821	1.21603	1.51048	0.973962
			317	1.28642	1.16732	1.21902	1.51343	0.97016
			318	1.27714	1.15795	1.21551	1.50931	0.969522
			319	1.26701	1.13939	1.21264	1.50186	0.966006
			320	1.28531	1.16857	1.21468	1.51202	0.961719
			321	1.29247	1.17505	1.21707	1.52226	0.965004
			322	1.29211	1.17901	1.22014	1.52322	0.964764
			323	1.29102	1.17937	1.22915	1.52523	0.969846
			324	1.29332	1.1779	1.22141	1.52882	0.965757
			325	1.29322	1.17872	1.22257	1.52699	0.967536
			326	1.29019	1.17803	1.22414	1.52839	0.965835
			327	1.29376	1.1752	1.2226	1.5281	0.963501
			328	1.29415	1.17525	1.22557	1.52336	0.964981
			329	1.29461	1.18418	1.22201	1.52655	0.964933
			330	1.29339	1.17895	1.22357	1.52552	0.969337
			331	1.29259	1.17825	1.22116	1.52596	0.96517
			332	1.29432	1.17878	1.22262	1.52605	0.967714
			333	1.29633	1.1823	1.22338	1.5262	0.972674
			334	1.29707	1.17961	1.2215	1.52818	0.967223
			335	1.29548	1.1743	1.22549	1.52729	0.966058
			336	1.29593	1.17749	1.22349	1.52553	0.965058
			337	1.29394	1.17139	1.22345	1.52506	0.971276
			338	1.28976	1.15608	1.22204	1.52098	0.968535
			339	1.27969	1.14938	1.21731	1.51846	0.963694
			340	1.29483	1.17272	1.22844	1.53162	0.96309
			341	1.2979	1.17595	1.24861	1.53396	0.956389
			342	1.29825	1.18273	1.23967	1.53448	0.95882
			343	1.29833	1.18462	1.24146	1.53565	0.959538
			344	1.29872	1.18304	1.24177	1.53462	0.962639
			345	1.29912	1.18384	1.24016	1.53919	0.959302
			346	1.2978	1.18054	1.24463	1.53577	0.961446
			347	1.3019	1.18408	1.24703	1.53774	0.95853
			348	1.30084	1.18129	1.24503	1.53724	0.959555
			349	1.30047	1.18064	1.24232	1.53564	0.966278
			350	1.30109	1.18038	1.24329	1.53777	0.96023
			351	1.30055	1.18003	1.24048	1.53667	0.965094
			352	1.30134	1.1896	1.24374	1.5357	0.96313
			353	1.3047	1.1789	1.24529	1.53608	0.960809
			354	1.30252	1.17906	1.2432	1.53584	0.958841
			355	1.30115	1.17804	1.24366	1.53811	0.962731
			356	1.30447	1.18167	1.24419	1.53577	0.959829
			357	1.3018	1.18532	1.2433	1.53594	0.962111
			358	1.29293	1.1672	1.24035	1.53483	0.960011
			359	1.28698	1.14675	1.23612	1.52568	0.95886
			360	1.29861	1.17786	1.24149	1.53282	0.95752
			361	1.30188	1.18092	1.24492	1.54277	0.956172
			362	1.30203	1.18852	1.25013	1.54341	0.958214
			363	1.30525	1.18641	1.24788	1.54712	0.956845
			364	1.3053	1.18479	1.24738	1.54479	0.958426
			365	1.3062	1.18728	1.2502	1.5455	0.956519
			366	1.30671	1.19274	1.25371	1.54381	0.955526
			367	1.30951	1.1901	1.25009	1.54634	0.956337
			368	1.30685	1.19058	1.24965	1.54485	0.956238
			369	1.30556	1.18959	1.24964	1.54675	0.956673
			370	1.30628	1.19328	1.24881	1.54588	0.954985
			371	1.30775	1.1899	1.24942	1.5483	0.956485
			372	1.30771	1.19348	1.24966	1.5454	0.958956
			373	1.30774	1.18949	1.25215	1.54592	0.954197
			374	1.3087	1.18679	1.25085	1.54471	0.957414
			375	1.30969	1.19118	1.25064	1.54629	0.9576
			376	1.30704	1.19386	1.25209	1.54582	0.957118
			377	1.30624	1.19139	1.25552	1.54755	0.955896
			378	1.30876	1.19969	1.25217	1.5495	0.955897
			379	1.31099	1.1923	1.25133	1.54752	0.958502
			380	1.30902	1.19228	1.25102	1.54557	0.956615

## Sheet: ANS Liposomes
Fig. 5B		ANS time	Time (s)	SS-31	SPN4	SS-20	SPN 10	Neg Cont		ANS fract	[Pep] (mM)	SS-31 q Avg	SS-31 q SD	SPN4 q Avg	SPN4 q SD	SS-20 q Avg	SS-20 q SD	SPN10 q Avg	SPN10 q SD
1,8-ANS		course data	0	0.183493	0.211716	0.215595	0.210926	0.197587		saturation	0	0	0	0	0	0	0	0	0
Measurements			1	0.183788	0.205663	0.216806	0.21207	0.201677			4.97512	0.114971	0.00948107	0.107386	0.0103012	0.209506	0.0155387	0.0697807	0.00903509
(ys assay)			2	0.182148	0.205315	0.219616	0.207216	0.199477			9.90099	0.355272	0.00947397	0.307075	0.0122923	0.450069	0.00771723	0.324025	0.0604424
Liposomes			3	0.18043	0.20615	0.220435	0.217092	0.199677			14.7783	0.522073	0.0118924	0.484833	0.00539517	0.575186	0.0065006	0.532922	0.0202252
			4	0.180311	0.204547	0.224153	0.209071	0.196999			19.6078	0.606407	0.0355703	0.600961	0.00841219	0.662356	0.00833887	0.640625	0.0144963
			5	0.179958	0.20333	0.221997	0.215544	0.196666			24.3902	0.690598	0.0258399	0.684072	0.00587909	0.733907	0.00624621	0.71656	0.00849666
			6	0.181024	0.20503	0.21693	0.212127	0.198262			29.1262	0.76632	0.0049894	0.749198	0.00674533	0.787057	0.00639805	0.77524	0.0031902
			7	0.180315	0.205652	0.219565	0.212982	0.200877			33.8164	0.820228	0.00334381	0.807538	0.0057083	0.833783	0.00638379	0.823118	0.00378207
			8	0.179724	0.205246	0.2192	0.207924	0.199905			38.4615	0.864244	0.00178747	0.854558	0.00620097	0.87116	0.00694827	0.862869	0.00147015
			9	0.179096	0.203396	0.218829	0.212714	0.199458			43.0622	0.899497	0.00121724	0.892974	0.00334335	0.903433	0.00515505	0.896028	0.00443731
			10	0.179462	0.201136	0.216245	0.220027	0.196007			47.619	0.930189	0.00166192	0.927115	0.00374861	0.932013	0.00408951	0.925773	0.00540975
			11	0.180495	0.200012	0.215932	0.209258	0.198352			52.1327	0.956911	0.00184171	0.953258	0.00504932	0.956609	0.00324493	0.951135	0.00603479
			12	0.180675	0.200421	0.217332	0.208445	0.196913			56.6038	0.979238	0.000814196	0.978693	0.00405591	0.979415	0.00197885	0.975167	0.00390785
			13	0.178342	0.201565	0.21565	0.214078	0.19845			61.0329	1	0	1	0	1	0	1	0
			14	0.180111	0.203647	0.221601	0.212934	0.202666
			15	0.178868	0.204377	0.221439	0.217215	0.195654
			16	0.178451	0.201553	0.216039	0.212389	0.19474
			17	0.177194	0.209313	0.213879	0.212934	0.196407
			18	0.176678	0.203689	0.217167	0.212368	0.196422
			19	0.18098	0.20051	0.218237	0.209953	0.195207
			20	0.177945	0.202372	0.218547	0.215728	0.195062
			21	0.178603	0.203809	0.216342	0.217471	0.197179
			22	0.178783	0.199004	0.215901	0.212789	0.198838
			23	0.177911	0.201696	0.215375	0.215782	0.195807
			24	0.178016	0.206486	0.216098	0.210167	0.196654
			25	0.177096	0.200912	0.216975	0.212226	0.195877
			26	0.177639	0.199742	0.213855	0.209598	0.196128
			27	0.177211	0.200696	0.216263	0.209694	0.19752
			28	0.178206	0.206154	0.216548	0.210074	0.196399
			29	0.177507	0.199178	0.217198	0.213193	0.19463
			30	0.17752	0.201298	0.215657	0.214987	0.194756
			31	0.177805	0.201746	0.216325	0.211723	0.195873
			32	0.176919	0.200136	0.214563	0.217655	0.195332
			33	0.176542	0.201217	0.217315	0.208592	0.196101
			34	0.179001	0.199413	0.213322	0.213753	0.19636
			35	0.176053	0.199004	0.21444	0.213178	0.195371
			36	0.176597	0.230801	0.215774	0.210513	0.195646
			37	0.177384	0.20197	0.213693	0.216098	0.194132
			38	0.17916	0.20754	0.217893	0.215017	0.194399
			39	0.177337	0.199267	0.217171	0.210763	0.195485
			40	0.177221	0.204605	0.213741	0.209911	0.195932
			41	0.178257	0.202739	0.217326	0.213518	0.195375
			42	0.176661	0.199251	0.217191	0.215367	0.194489
			43	0.17605	0.200441	0.21487	0.211835	0.197411
			44	0.178006	0.20299	0.213728	0.212133	0.196269
			45	0.18022	0.198486	0.21413	0.210046	0.194536
			46	0.176536	0.200371	0.215186	0.215002	0.192591
			47	0.175778	0.202179	0.213246	0.212961	0.194983
			48	0.17515	0.20165	0.214866	0.2107	0.194838
			49	0.176121	0.205563	0.214113	0.216989	0.193775
			50	0.173941	0.198676	0.215458	0.21882	0.194101
			51	0.175741	0.21048	0.21358	0.214448	0.198972
			52	0.176855	0.198977	0.213693	0.218242	0.193752
			53	0.175751	0.20014	0.213208	0.217793	0.193226
			54	0.174464	0.203821	0.218068	0.218847	0.193662
			55	0.174838	0.199108	0.215465	0.216399	0.195246
			56	0.176447	0.198679	0.215757	0.214009	0.192799
			57	0.174423	0.202446	0.215485	0.21515	0.194799
			58	0.178019	0.200572	0.217625	0.212714	0.191885
			59	0.251469	0.236081	0.240833	0.355354	0.227584
			60	0.808946	0.796328	0.758546	0.758379	0.762034
			61	0.921502	0.941599	0.885933	0.828715	0.969798
			62	0.926606	0.942522	0.894336	0.862667	0.938879
			63	0.924199	0.941047	0.89467	0.852669	0.946542
			64	0.930294	0.93893	0.902836	0.861499	1.01711
			65	0.930867	0.940927	0.896641	0.889545	0.948727
			66	0.937608	0.941425	0.900469	0.879359	0.991301
			67	0.940151	0.947474	0.903366	0.880196	0.987493
			68	0.938093	0.940684	0.909901	0.886947	0.946938
			69	0.944762	0.945145	0.916949	0.887507	0.943103
			70	0.946453	0.952577	0.916354	0.925786	1.02813
			71	0.953462	0.948934	0.922841	0.898409	0.949029
			72	0.95303	0.956833	0.924861	0.908275	0.95646
			73	0.959933	0.952886	0.931843	0.91094	0.946974
			74	0.962439	0.965235	0.937949	0.915531	0.946636
			75	0.960684	0.959506	0.942582	0.917362	1.01577
			76	0.96792	0.961407	0.944756	0.928077	0.957072
			77	0.963838	0.978622	0.95277	0.936845	1.05188
			78	0.974154	0.964315	0.957765	0.934343	0.99105
			79	0.970039	0.973396	0.956991	0.946922	0.963574
			80	0.975988	0.984544	0.961624	0.96627	0.990046
			81	0.97738	0.986854	0.966378	0.95152	0.966017
			82	0.980894	0.978684	0.965883	0.976377	0.973586
			83	0.981421	0.984691	0.980264	0.973836	0.971367
			84	0.98557	0.983571	0.973939	0.959477	1.05275
			85	0.986728	0.986317	0.982349	0.972442	0.983214
			86	0.991088	0.990921	0.98077	0.973595	0.979179
			87	0.988955	0.987615	0.988403	0.981366	0.982885
			88	0.998018	0.98571	0.987907	0.975718	1.02002
			89	0.998572	0.995506	0.994952	0.982091	0.99894
			90	0.999651	1.01069	0.996899	0.993969	1.03456
			91	0.998959	0.998759	1.00084	0.993159	0.985438
			92	1.00371	0.996194	1.00267	1.00399	0.9857
			93	1.00622	1.00126	1.00575	0.989314	1.0481
			94	1.00608	1.01782	1.00778	1.00953	0.989344
			95	1.00664	1.00549	1.00855	1.00688	1.04656
			96	1.00808	1.00942	1.01108	1.01016	0.993163
			97	1.00924	1.0121	1.01845	1.00525	0.996697
			98	1.01321	1.00701	1.02088	1.01103	0.996999
			99	1.01292	1.0098	1.02084	1.01276	0.994434
			100	1.01688	1.01825	1.02734	1.01802	1.06364
			101	1.01459	1.01552	1.03024	1.01634	0.998552
			102	1.01891	1.01845	1.03165	1.02519	1.00414
			103	1.02144	1.02018	1.03464	1.03268	1.05215
			104	1.02249	1.0228	1.03569	1.02356	1.03389
			105	1.02166	1.01599	1.04002	1.03288	1.02039
			106	1.02541	1.02765	1.03796	1.03352	1.01638
			107	1.02791	1.03196	1.04054	1.03997	1.05123
			108	1.0268	1.02632	1.04269	1.04598	1.0136
			109	1.02931	1.0366	1.04946	1.04256	1.0795
			110	1.0301	1.03424	1.05104	1.04028	1.02677
			111	1.03135	1.03616	1.05577	1.04355	1.01695
			112	1.02972	1.03187	1.04977	1.04814	1.06205
			113	1.03754	1.03493	1.05591	1.04494	1.01948
			114	1.0343	1.03012	1.05203	1.05431	1.02311
			115	1.03369	1.03452	1.06229	1.0501	1.04164
			116	1.03698	1.03845	1.0634	1.0526	1.02979
			117	1.03776	1.03196	1.06567	1.05814	1.01756
			118	1.04029	1.04587	1.06053	1.0764	1.03499
			119	1.08836	1.06574	1.09443	1.18408	1.13239
			120	1.63023	1.55967	1.89039	2.47804	1.01427
			121	1.68018	1.66555	2.4909	2.45098	1.01817
			122	1.64692	1.60216	2.54256	1.92754	1.02958
			123	1.62365	1.59725	2.51819	1.86906	1.01714
			124	1.60511	1.56665	2.49412	1.84109	1.05244
			125	1.58992	1.5785	2.4799	1.82402	1.05648
			126	1.58739	1.55559	2.48	1.83666	1.02193
			127	1.58145	1.55519	2.47195	1.7806	1.10152
			128	1.58637	1.54686	2.46192	1.7987	1.02056
			129	1.58037	1.54294	2.4515	1.80422	1.03554
			130	1.58437	1.54766	2.45478	1.79213	1.05963
			131	1.58013	1.55123	2.45099	1.77061	1.04462
			132	1.58033	1.54353	2.44299	1.78213	1.0623
			133	1.58346	1.54491	2.43747	1.79999	1.05028
			134	1.57761	1.55219	2.44162	1.77478	1.03233
			135	1.57608	1.54982	2.43086	1.76891	1.06265
			136	1.58525	1.54205	2.44248	1.77768	1.0312
			137	1.58119	1.54916	2.43329	1.76869	1.11883
			138	1.58509	1.54164	2.43269	1.78262	1.03645
			139	1.65982	1.58101	2.43312	1.87666	1.05137
			140	2.34151	2.2312	3.19166	3.30907	1.03165
			141	2.7526	2.56225	3.98924	4.46449	1.02987
			142	2.81208	2.59551	4.09181	4.71262	1.03993
			143	2.81428	2.59001	4.12535	4.71074	1.02641
			144	2.79581	2.5809	4.12586	4.67865	1.02768
			145	2.79063	2.55905	4.11812	4.63818	1.02994
			146	2.78725	2.55422	4.10589	4.6372	1.04497
			147	2.7735	2.54497	4.09803	4.60554	1.03007
			148	2.76835	2.53773	4.09571	4.58345	1.03419
			149	2.76311	2.53714	4.08775	4.57126	1.03285
			150	2.76049	2.53434	4.07855	4.55839	1.03149
			151	2.75113	2.53129	4.06953	4.57108	1.05674
			152	2.74833	2.54022	4.06856	4.55638	1.03273
			153	2.74549	2.52164	4.06253	4.53857	1.03831
			154	2.73496	2.51467	4.05804	4.54342	1.0357
			155	2.73932	2.52621	4.06409	4.57259	1.0372
			156	2.73176	2.52083	4.06074	4.52995	1.07546
			157	2.73578	2.52294	4.05414	4.52098	1.10822
			158	2.72577	2.50278	4.0451	4.516	1.07001
			159	2.76681	2.54372	4.04585	4.57561	1.02503
			160	3.27597	3.06024	4.56887	5.8841	1.02489
			161	3.5712	3.4134	4.9071	6.75892	1.03173
			162	3.61133	3.44752	4.95748	6.88686	1.06816
			163	3.6077	3.45852	4.95863	6.89852	1.05009
			164	3.60129	3.43646	4.96054	6.9142	1.046
			165	3.59477	3.43974	4.94991	6.86022	1.03976
			166	3.5946	3.43135	4.94406	6.86771	1.03601
			167	3.58486	3.41483	4.93374	6.8532	1.03553
			168	3.57443	3.4217	4.93101	6.83552	1.04023
			169	3.57127	3.4126	4.9322	6.85235	1.09337
			170	3.57821	3.41228	4.92614	6.83021	1.11991
			171	3.57672	3.40926	4.91985	6.81106	1.03869
			172	3.56544	3.40236	4.92996	6.81928	1.05551
			173	3.5661	3.39828	4.92107	6.81896	1.06648
			174	3.55182	3.39986	4.91346	6.79637	1.05589
			175	3.56664	3.39274	4.91269	6.78369	1.0426
			176	3.55015	3.3972	4.91386	6.78048	1.03852
			177	3.54438	3.40108	4.90756	6.80651	1.13285
			178	3.55443	3.3824	4.90879	6.77461	1.04209
			179	3.59285	3.40466	4.90711	6.8236	1.03033
			180	3.82154	3.85285	5.2335	7.67482	1.0373
			181	3.99063	4.00532	5.51118	7.99089	1.03316
			182	4.00391	4.02185	5.53622	8.01927	1.04267
			183	4.009	4.01588	5.53684	8.04493	1.04028
			184	4.0061	4.01055	5.53974	8.02409	1.03529
			185	3.9976	4.00406	5.53018	8.01447	1.04157
			186	3.99896	3.99742	5.52835	8.00721	1.03543
			187	3.98777	3.99096	5.5238	8.02606	1.0423
			188	3.99315	3.99773	5.51825	7.98286	1.04003
			189	3.98987	3.9756	5.52109	8.00849	1.03809
			190	3.99039	3.97905	5.51827	7.98853	1.03484
			191	3.98867	3.98743	5.51585	7.97622	1.05533
			192	3.9829	3.97808	5.50987	7.99663	1.03739
			193	3.99081	3.97948	5.51236	7.97821	1.04184
			194	3.98287	3.97485	5.51008	7.99412	1.04246
			195	3.98179	3.96941	5.50955	7.97821	1.08805
			196	3.97814	3.98397	5.51091	7.99797	1.04407
			197	3.98638	3.97264	5.51391	7.98282	1.08367
			198	3.97979	3.97313	5.51214	7.97912	1.04022
			199	3.98647	4.00287	5.51349	8.00187	1.05486
			200	4.24301	4.24862	5.81913	8.4261	1.03543
			201	4.38188	4.379	5.99496	8.78384	1.03937
			202	4.39795	4.41344	6.01987	8.83193	1.04135
			203	4.40166	4.4062	6.01612	8.8301	1.10647
			204	4.3983	4.41966	6.00396	8.82961	1.03933
			205	4.40736	4.40378	6.01185	8.82615	1.04004
			206	4.39406	4.40445	6.00027	8.82837	1.11028
			207	4.3979	4.39925	5.99815	8.82694	1.04031
			208	4.39273	4.39028	5.99961	8.82081	1.03844
			209	4.39825	4.39471	5.99611	8.80697	1.0366
			210	4.40113	4.396	6.00102	8.83348	1.04458
			211	4.39216	4.3889	6.00474	8.8064	1.04077
			212	4.39963	4.389	5.99599	8.80896	1.03982
			213	4.40978	4.39136	6.00081	8.81985	1.04023
			214	4.39365	4.38647	6.00955	8.81059	1.0353
			215	4.3969	4.38508	6.0032	8.81382	1.03969
			216	4.39972	4.39607	5.99944	8.81245	1.04554
			217	4.40094	4.38522	5.99846	8.80658	1.03631
			218	4.3969	4.39346	6.00947	8.85243	1.0402
			219	4.41195	4.38796	5.98672	8.81847	1.09339
			220	4.5903	4.59598	6.20163	9.10414	1.03086
			221	4.71091	4.71874	6.35891	9.44674	1.03679
			222	4.71816	4.71913	6.37105	9.46957	1.05476
			223	4.72235	4.73532	6.36176	9.45577	1.0799
			224	4.72067	4.72176	6.36008	9.4657	1.04197
			225	4.73734	4.71373	6.36391	9.44146	1.03223
			226	4.76288	4.71831	6.37283	9.45523	1.0329
			227	4.76354	4.72336	6.35983	9.45427	1.07652
			228	4.76704	4.71026	6.37302	9.46615	1.03347
			229	4.76694	4.71991	6.36284	9.44521	1.06964
			230	4.76677	4.70983	6.36218	9.44116	1.03488
			231	4.77076	4.7189	6.35333	9.45496	1.0353
			232	4.76814	4.71386	6.36168	9.45038	1.03198
			233	4.77248	4.70952	6.35197	9.45933	1.03665
			234	4.77985	4.71462	6.34713	9.46468	1.03412
			235	4.76552	4.70502	6.36549	9.44817	1.09545
			236	4.7673	4.71357	6.3601	9.44331	1.05962
			237	4.78377	4.71206	6.35982	9.45167	1.05679
			238	4.76851	4.70898	6.3629	9.46245	1.03364
			239	4.79873	4.71576	6.36478	9.46085	1.11003
			240	4.96677	4.89639	6.55165	9.77235	1.02807
			241	5.01576	4.99424	6.67185	9.93797	1.07326
			242	5.02349	4.99395	6.69297	9.98753	1.03309
			243	5.02354	4.99952	6.68125	9.9639	1.07635
			244	5.01942	5.00759	6.67844	9.9875	1.03257
			245	5.02448	4.99971	6.6821	9.9925	1.04752
			246	5.02519	4.99837	6.68172	9.95068	1.03918
			247	5.02191	4.99442	6.67719	9.97091	1.03462
			248	5.03114	5.00107	6.6759	9.96643	1.03992
			249	5.02047	4.9864	6.67219	9.99726	1.04706
			250	5.02628	4.99362	6.68648	9.97031	1.04224
			251	5.02904	5.00035	6.67467	9.9685	1.03641
			252	5.03028	5.00425	6.67531	9.97317	1.03549
			253	5.02876	5.00588	6.67956	9.999	1.03637
			254	5.0317	5.0168	6.67288	9.96447	1.0395
			255	5.04237	5.01128	6.67093	9.96101	1.03591
			256	5.03673	5.00035	6.68423	9.97678	1.03622
			257	5.03352	4.99074	6.67367	9.9657	1.10611
			258	5.04274	4.99505	6.66679	9.96468	1.03676
			259	5.05421	5.00297	6.67961	9.98187	1.06833
			260	5.17516	5.19379	6.79103	10.2092	1.02873
			261	5.22268	5.24929	6.90876	10.3923	1.03181
			262	5.23999	5.23707	6.92933	10.3916	1.03545
			263	5.24273	5.24061	6.93136	10.3982	1.03318
			264	5.23131	5.23087	6.92642	10.4038	1.0381
			265	5.2474	5.2368	6.92784	10.4108	1.04231
			266	5.23657	5.23335	6.93741	10.4227	1.0978
			267	5.24062	5.23417	6.92855	10.3912	1.05357
			268	5.23482	5.2322	6.92882	10.4001	1.05711
			269	5.24533	5.22921	6.92453	10.4064	1.04142
			270	5.24751	5.23931	6.93279	10.3959	1.08203
			271	5.24167	5.22534	6.92426	10.4006	1.04006
			272	5.24234	5.22816	6.93495	10.4075	1.04301
			273	5.2427	5.22974	6.93565	10.4026	1.04495
			274	5.2456	5.24477	6.92849	10.4076	1.05105
			275	5.24581	5.22894	6.92634	10.4028	1.05067
			276	5.24951	5.24234	6.9336	10.4043	1.12092
			277	5.25097	5.23648	6.93686	10.3921	1.04433
			278	5.25122	5.23391	6.93781	10.4188	1.03814
			279	5.24964	5.23651	6.93439	10.4105	1.02891
			280	5.37825	5.39328	7.06296	10.5922	1.03271
			281	5.41357	5.41243	7.14865	10.7484	1.0467
			282	5.40771	5.43668	7.16162	10.7784	1.03498
			283	5.41072	5.41946	7.15375	10.7884	1.04338
			284	5.41173	5.42913	7.15319	10.7527	1.0404
			285	5.40464	5.4224	7.14434	10.7611	1.0372
			286	5.41119	5.41625	7.14202	10.7711	1.04855
			287	5.41378	5.42287	7.14821	10.7647	1.04073
			288	5.412	5.41767	7.14826	10.76	1.09706
			289	5.4185	5.41444	7.14821	10.752	1.03614
			290	5.41966	5.41711	7.14231	10.7531	1.04151
			291	5.41707	5.42806	7.16177	10.7669	1.0432
			292	5.40649	5.42481	7.15192	10.7618	1.04641
			293	5.41839	5.43136	7.14664	10.765	1.04533
			294	5.41933	5.42533	7.14193	10.7573	1.03894
			295	5.42098	5.41878	7.15458	10.7855	1.03531
			296	5.42208	5.43067	7.15376	10.7764	1.03902
			297	5.42714	5.41836	7.14712	10.7715	1.07355
			298	5.422	5.4198	7.15822	10.7909	1.03801
			299	5.43525	5.42319	7.15614	10.7997	1.02594
			300	5.53964	5.54699	7.26978	10.9703	1.03739
			301	5.55579	5.59389	7.34724	11.093	1.0824
			302	5.56118	5.59006	7.34076	11.0684	1.03572
			303	5.55966	5.59647	7.33127	11.0719	1.0845
			304	5.55803	5.58858	7.3512	11.0889	1.03463
			305	5.55911	5.59221	7.34585	11.0886	1.03893
			306	5.56332	5.59962	7.34738	11.0924	1.03616
			307	5.55651	5.58285	7.34357	11.0806	1.04107
			308	5.5698	5.58807	7.34163	11.0789	1.03707
			309	5.55983	5.59941	7.32984	11.0798	1.06772
			310	5.56756	5.59046	7.34163	11.086	1.0416
			311	5.56952	5.58519	7.3442	11.0748	1.03686
			312	5.56775	5.58717	7.34237	11.0938	1.03682
			313	5.56471	5.58231	7.34455	11.0858	1.05509
			314	5.5644	5.58617	7.34123	11.0889	1.07188
			315	5.56655	5.59247	7.33385	11.0904	1.03895
			316	5.57552	5.58143	7.34789	11.0791	1.04254
			317	5.56698	5.57458	7.3413	11.0932	1.03592
			318	5.56604	5.58701	7.34778	11.0937	1.03231
			319	5.5712	5.5827	7.34133	11.0763	1.03396
			320	5.65075	5.67259	7.39438	11.2059	1.03815
			321	5.67375	5.71734	7.50111	11.3314	1.09708
			322	5.6865	5.72491	7.5138	11.3835	1.03013
			323	5.69267	5.7124	7.50703	11.3445	1.03412
			324	5.69342	5.71089	7.5197	11.3355	1.05174
			325	5.69501	5.71434	7.50933	11.3438	1.04295
			326	5.68721	5.71912	7.50652	11.3396	1.04372
			327	5.69292	5.71386	7.51401	11.3565	1.05526
			328	5.69815	5.72804	7.50362	11.3664	1.03528
			329	5.69639	5.71782	7.49837	11.3827	1.03396
			330	5.69746	5.72743	7.5089	11.3519	1.03735
			331	5.69272	5.71242	7.51706	11.359	1.03824
			332	5.69435	5.71547	7.50577	11.3801	1.03617
			333	5.6947	5.717	7.50938	11.3548	1.03718
			334	5.68923	5.71676	7.5109	11.36	1.03533
			335	5.70325	5.71692	7.50094	11.3748	1.03546
			336	5.69222	5.73572	7.50731	11.397	1.09691
			337	5.6945	5.71443	7.49981	11.3712	1.0331
			338	5.69491	5.70675	7.51642	11.3614	1.06652
			339	5.68985	5.69498	7.5068	11.3593	1.0393
			340	5.77862	5.78714	7.59906	11.5431	1.02812
			341	5.7963	5.84025	7.65343	11.5916	1.02721
			342	5.78991	5.84045	7.66741	11.5951	1.02904
			343	5.80145	5.84607	7.66061	11.626	1.12743
			344	5.80614	5.84249	7.65907	11.5968	1.03178
			345	5.80117	5.84799	7.65359	11.6189	1.03125
			346	5.81045	5.84185	7.66504	11.6064	1.0446
			347	5.80271	5.83816	7.66904	11.609	1.04992
			348	5.79641	5.84511	7.6521	11.6247	1.03248
			349	5.80513	5.83483	7.66061	11.6376	1.03845
			350	5.80295	5.84125	7.66617	11.6289	1.09888
			351	5.79728	5.84317	7.65447	11.6446	1.03786
			352	5.80746	5.84563	7.66969	11.6188	1.06137
			353	5.80756	5.83186	7.6566	11.6175	1.03298
			354	5.80165	5.84471	7.66294	11.6315	1.03082
			355	5.80989	5.8558	7.67224	11.6137	1.07959
			356	5.81146	5.84113	7.66114	11.6198	1.0653
			357	5.80556	5.8681	7.65568	11.6209	1.02822
			358	5.80654	5.83691	7.67108	11.6227	1.03389
			359	5.82481	5.83519	7.66413	11.6365	1.02088
			360	5.8852	5.92922	7.76766	11.8128	1.025
			361	5.90762	5.94992	7.78609	11.8504	1.06844
			362	5.90165	5.95822	7.80801	11.8745	1.02654
			363	5.9061	5.96559	7.80905	11.906	1.04004
			364	5.91008	5.95645	7.80877	11.873	1.02913
			365	5.90307	5.95058	7.80267	11.8854	1.02878
			366	5.90992	5.95249	7.80647	11.8661	1.02648
			367	5.89779	5.95023	7.79302	11.8969	1.02595
			368	5.90255	5.94295	7.80616	11.8838	1.0288
			369	5.90255	5.94327	7.79922	11.8803	1.06901
			370	5.90705	5.94664	7.80578	11.8957	1.03304
			371	5.90474	5.94058	7.79762	11.8869	1.02916
			372	5.90622	5.94922	7.80868	11.9138	1.06739
			373	5.90429	5.95267	7.79138	11.8923	1.03179
			374	5.90922	5.95209	7.80035	11.9186	1.02853
			375	5.90772	5.94977	7.80257	11.913	1.03109
			376	5.9173	5.94324	7.80612	11.9238	1.07251
			377	5.90402	5.95101	7.79778	11.9097	1.05725
			378	5.91047	5.95315	7.80889	11.9158	1.0467
			379	5.91074	5.9511	7.79822	11.9113	1.06768
			380	5.91082	5.94137	7.81341	11.9167	1.04643

## Sheet: ANEPPS
Fig. 5C		ANEPPS	SS-31							ANEPPS fract		[SS-31](mM)	SS31 q1	SS31 q2	SS31 q3	SS31 q AVG	SS31 q SD
di-8-ANEPPS		peptide	P:L	R1	R2	R3	AVG	SD		saturation		0	0	0	0	0	0
Measurements		titration	0	3.73221	3.78306	3.77266	3.76265	0.0268635				4	0.247183	0.230446	0.292958	0.256862	0.0323607
(yd assay)			0.02	3.55913	3.62128	3.56892	3.58311	0.0334159				10	0.554998	0.565906	0.5632	0.561368	0.00568042
			0.05	3.34359	3.38577	3.38097	3.37011	0.023091				20	0.879216	0.897594	0.877826	0.884879	0.0110334
			0.1	3.11657	3.15291	3.16216	3.14388	0.0240992				40	0.971531	0.980717	0.977769	0.976672	0.00468993
			0.2	3.05193	3.09455	3.09265	3.07971	0.0240798				60	1	1	1	1	0
			0.3	3.03199	3.08102	3.07719	3.0634	0.0272662
			SPN4									[SPN4](mM)	SPN4 q1	SPN4 q2	SPN4 q3	SPN4 q AVG	SPN4 q SD
			P:L	R1	R2	R3	AVG	SD				0	0	0	0	0	0
			0	3.73221	3.78306	3.77266	3.76265	0.0268635				4	0.209738	0.329289	0.291446	0.276824	0.0611022
			0.02	3.59814	3.56554	3.58548	3.58305	0.0164387				10	0.566932	0.627216	0.639129	0.611092	0.038705
			0.05	3.36981	3.36873	3.36219	3.36691	0.00412369				20	0.877114	0.890568	0.881349	0.88301	0.00687888
			0.1	3.17154	3.19476	3.20663	3.19098	0.0178489				40	0.945083	0.96584	0.977328	0.96275	0.0163431
			0.2	3.12809	3.14504	3.14499	3.13937	0.00976967				60	1	1	1	1	0
			0.3	3.09299	3.12247	3.13043	3.11529	0.0197251
			SS-20									[SS-20](mM)	SS20 q1	SS20 q2	SS20 q3	SS20 q AVG	SS20 q SD
			P:L	R1	R2	R3	AVG	SD				0	0	0	0	0	0
			0	3.73221	3.78306	3.77266	3.76265	0.0268635				4	0.246314	0.252029	0.322074	0.273472	0.0421872
			0.02	3.66065	3.69509	3.66663	3.67413	0.0184049				10	0.616227	0.605977	0.681978	0.634727	0.0412398
			0.05	3.55317	3.57155	3.54815	3.55763	0.0123215				20	0.842997	0.783566	0.809154	0.811906	0.0298109
			0.1	3.48729	3.50957	3.50628	3.50105	0.0120283				40	0.941505	0.902565	0.978601	0.94089	0.0380216
			0.2	3.45867	3.46804	3.4505	3.45907	0.00877535				60	1	1	1	1	0
			0.3	3.44167	3.43403	3.44345	3.43972	0.00500777
			SPN10									[SPN10](mM)	SPN10 q1	SPN10 q2	SPN10 q3	SPN10 q AVG	SPN10 q SD
			P:L	R1	R2	R3	AVG	SD				0	0	0	0	0	0
			0	3.73221	3.78306	3.77266	3.76265	0.0268635				4	0.169441	0.200302	0.187841	0.185861	0.0155253
			0.02	3.60777	3.62671	3.62858	3.62102	0.011515				10	0.418868	0.452349	0.422377	0.431198	0.0184009
			0.05	3.42458	3.42997	3.44868	3.43441	0.0126519				20	0.772578	0.805527	0.786703	0.788269	0.0165303
			0.1	3.16479	3.15429	3.16923	3.16277	0.00767482				40	0.96716	0.97911	0.969498	0.971923	0.00633284
			0.2	3.02188	3.01879	3.02902	3.02323	0.00524573				60	1	1	1	1	0
			0.3	2.99776	3.00249	3.00562	3.00196	0.0039567

## Sheet: TMRM
Fig. 5D		TMRM time	Time (s)	Cont	SS-31	SPN4	SS-20	SPN10		TMRM		Cont	SS-31	SPN4	SS-20	SPN10
TMRM		course data	0	1.00152	1.01158	1.01133	0.989639	1.00041		DF/F	Avg DF/F	-0.340668	-0.340646	-0.355732	-0.357779	-0.333899
Measurements			1	1.00146	1.01015	1.01125	0.990761	1.00029			SD	0.00846278	0.0355102	0.00866992	0.0293376	0.069181
(DYm assay)			2	1.00209	1.00879	1.01056	0.990533	0.998639
			3	1.0008	1.01031	1.01003	0.99131	1.00031
			4	1.0007	1.01009	1.00976	0.99096	1.00078
			5	1.00008	1.00999	1.00885	0.991141	0.998864
			6	1.00298	1.00952	1.00875	0.992151	0.998484
			7	1.00064	1.00846	1.00951	0.992158	0.999639
			8	1.00161	1.00738	1.00904	0.991485	0.99952
			9	1.00084	1.00904	1.00737	0.994061	1.00036
			10	1.00131	1.00619	1.00683	0.992321	1.00024
			11	1.00007	1.00763	1.00765	0.992676	0.998919
			12	1.00066	1.00661	1.00722	0.992908	0.998556
			13	1.0014	1.0075	1.00654	0.992523	1.00063
			14	1.00087	1.00639	1.00664	0.995211	0.998197
			15	1.00065	1.00652	1.00658	0.992821	0.99849
			16	1.00059	1.00611	1.00498	0.993851	0.998901
			17	1.00078	1.006	1.0051	0.993505	0.999749
			18	1.00026	1.00658	1.00545	0.994956	1.00074
			19	1.00007	1.00645	1.00543	0.995416	1.00031
			20	0.999937	1.00458	1.00472	0.995662	0.999949
			21	1.00083	1.0053	1.0053	0.995367	1.00016
			22	1.00066	1.00596	1.00535	0.996185	0.99854
			23	0.999994	1.00514	1.00426	0.99645	0.99939
			24	1.0001	1.00375	1.00403	0.995054	1.0001
			25	1.00067	1.0059	1.0045	0.995977	0.999656
			26	1.00056	1.00385	1.00411	0.996307	0.998866
			27	1.00126	1.00278	1.004	0.996422	0.999835
			28	1.00115	1.00443	1.0037	0.997027	0.998843
			29	1.00015	1.00336	1.00406	0.99673	0.998702
			30	1.00034	1.00411	1.00444	0.995981	1.00034
			31	1.00002	1.00318	1.00244	0.997336	0.999482
			32	0.999639	1.00291	1.00164	0.99883	1.00003
			33	0.99898	1.00211	1.00124	0.99797	0.999927
			34	0.99956	1.00292	1.00215	0.997708	0.999814
			35	0.999635	1.00349	1.00204	0.998823	0.999748
			36	0.999861	1.00253	1.00024	1	0.999577
			37	1.00062	1.00262	1.0016	0.999134	0.999766
			38	0.999569	1.00278	1.00231	0.998632	1.00022
			39	0.999442	1.00255	1.00183	0.999065	1.0007
			40	0.998789	1.00136	1.00153	0.999872	1.00061
			41	1.00012	1.00229	1.00131	0.999608	1.00021
			42	1.00053	1.00088	1.00038	0.999591	1.00072
			43	1.00025	1.00095	1.00027	0.99915	0.999698
			44	1.00026	1.00048	1.00039	0.99973	0.999492
			45	0.999761	0.999904	1.00055	0.999784	1.00013
			46	1.00089	0.999605	1.00131	0.9996	1.00006
			47	1.00037	0.999491	0.999945	0.99987	1.00002
			48	1.0005	1.00028	1.00063	1.0009	1.00098
			49	1.0005	0.999462	0.999472	0.999941	0.999982
			50	1.00021	0.998998	0.999773	1.00145	1.00037
			51	0.99989	0.999009	0.998918	1.00016	0.999461
			52	1.00076	1	0.999456	1.00037	0.999923
			53	0.999862	0.999004	0.998365	1.00062	0.999122
			54	0.999128	0.999302	0.998674	0.999194	0.999528
			55	0.998175	0.998983	0.999016	1.00017	0.999701
			56	0.998331	0.99872	0.998765	1.00112	0.999787
			57	0.998227	0.999407	0.997419	0.999005	0.999513
			58	0.998257	0.998105	0.996819	1.00062	0.998914
			59	0.979989	0.979474	0.99404	1.00073	0.999496
			60	0.893201	0.917142	0.894115	0.978623	0.964983
			61	0.879674	0.881171	0.886951	0.923969	0.889089
			62	0.802378	0.803383	0.823395	0.823707	0.861982
			63	0.77545	0.773958	0.779571	0.806934	0.825526
			64	0.746125	0.74669	0.738479	0.769325	0.778861
			65	0.728286	0.717787	0.719063	0.735078	0.756734
			66	0.704685	0.695751	0.694054	0.711405	0.733801
			67	0.688195	0.680136	0.675842	0.692697	0.714299
			68	0.674016	0.669879	0.663623	0.680104	0.700168
			69	0.666843	0.661602	0.652648	0.668587	0.689258
			70	0.663868	0.658058	0.647761	0.659112	0.681603
			71	0.659344	0.65333	0.643228	0.653497	0.674746
			72	0.657091	0.652129	0.641591	0.650216	0.669844
			73	0.655757	0.650166	0.637618	0.647602	0.666146
			74	0.655382	0.650526	0.637923	0.645333	0.665569
			75	0.655209	0.6516	0.636889	0.64441	0.664392
			76	0.654483	0.649799	0.635784	0.644511	0.662213
			77	0.654749	0.649608	0.635016	0.642609	0.660948
			78	0.654193	0.649433	0.635458	0.642592	0.6619
			79	0.653789	0.649021	0.634296	0.642058	0.660227
			80	0.652169	0.648431	0.633689	0.641228	0.660004
			81	0.652502	0.647734	0.633334	0.639585	0.660413
			82	0.651702	0.648009	0.633954	0.640506	0.659498
			83	0.650666	0.647668	0.63244	0.639708	0.659784
			84	0.650732	0.646273	0.631694	0.639542	0.659309
			85	0.649688	0.646372	0.632345	0.638548	0.659018
			86	0.650261	0.647211	0.631433	0.638441	0.65886
			87	0.650379	0.645886	0.632141	0.638799	0.658963
			88	0.6493	0.645742	0.630695	0.636965	0.657795
			89	0.648661	0.646066	0.630152	0.638747	0.658358
			90	0.649091	0.646059	0.630968	0.637374	0.657303
			91	0.648199	0.645453	0.629633	0.636701	0.65856
			92	0.64858	0.645586	0.629304	0.637252	0.658136
			93	0.647803	0.645669	0.630166	0.636451	0.65795
			94	0.64904	0.6454	0.629716	0.637104	0.658753
			95	0.649095	0.646043	0.629735	0.636088	0.658382
			96	0.649121	0.645578	0.630329	0.635335	0.657071
			97	0.649022	0.646319	0.629552	0.635301	0.658489
			98	0.649193	0.646072	0.629643	0.63611	0.657115
			99	0.649817	0.645415	0.630363	0.636279	0.658232
			100	0.649116	0.646576	0.630335	0.635251	0.658553
			101	0.649505	0.647057	0.630759	0.634991	0.65845
			102	0.649754	0.646627	0.630611	0.635059	0.658389
			103	0.648707	0.646795	0.631327	0.635324	0.658706
			104	0.650272	0.647478	0.631645	0.635357	0.657674
			105	0.649852	0.647409	0.630498	0.635501	0.658513
			106	0.649985	0.647609	0.630586	0.635866	0.65773
			107	0.649983	0.648154	0.630614	0.635483	0.659129
			108	0.650212	0.648661	0.631421	0.635799	0.658929
			109	0.651092	0.64801	0.631928	0.635528	0.659533
			110	0.651349	0.648668	0.632298	0.635977	0.659726
			111	0.649774	0.648568	0.631684	0.636092	0.659311
			112	0.651829	0.648749	0.632369	0.635095	0.659411
			113	0.65062	0.649046	0.631986	0.637417	0.659899
			114	0.651189	0.648529	0.632847	0.635692	0.659924
			115	0.651262	0.648976	0.632553	0.636778	0.659635
			116	0.652611	0.648928	0.632225	0.637411	0.659741
			117	0.651601	0.64989	0.632742	0.63684	0.659733
			118	0.651061	0.650009	0.633927	0.636582	0.659871
			119	0.651352	0.650385	0.633287	0.63634	0.659788
			120	0.651747	0.651008	0.633557	0.637364	0.660678
			121	0.651732	0.651192	0.634257	0.636371	0.659869
			122	0.652516	0.651031	0.634671	0.637246	0.661602
			123	0.653268	0.650871	0.634579	0.638163	0.661173
			124	0.651927	0.651412	0.63489	0.637973	0.660634
			125	0.652983	0.651448	0.63479	0.638088	0.66077
			126	0.653013	0.65199	0.634902	0.638639	0.661403
			127	0.65331	0.651239	0.635925	0.638078	0.660825
			128	0.653908	0.65245	0.635547	0.637853	0.661376
			129	0.653515	0.653504	0.636253	0.63905	0.662165
			130	0.654039	0.652416	0.636561	0.638573	0.661665
			131	0.654061	0.653633	0.637139	0.638753	0.661729
			132	0.65364	0.652419	0.636479	0.638684	0.661975
			133	0.654454	0.653612	0.638062	0.639413	0.662184
			134	0.654806	0.652552	0.637262	0.639449	0.66136
			135	0.654443	0.652357	0.637305	0.637766	0.662152
			136	0.654861	0.653971	0.636813	0.639442	0.661973
			137	0.655401	0.652769	0.637873	0.639229	0.662591
			138	0.655297	0.65443	0.637418	0.639663	0.662444
			139	0.655691	0.654592	0.637484	0.639547	0.663417
			140	0.655347	0.654959	0.638205	0.639831	0.662937
			141	0.65514	0.655058	0.638906	0.640221	0.662327
			142	0.655924	0.654785	0.638619	0.639967	0.662369
			143	0.655658	0.654692	0.638946	0.639476	0.664171
			144	0.655998	0.655651	0.640076	0.639816	0.663243
			145	0.656729	0.655806	0.638973	0.641408	0.664233
			146	0.656968	0.655604	0.639405	0.639332	0.664376
			147	0.655941	0.655749	0.640361	0.640117	0.663694
			148	0.656384	0.655601	0.640557	0.640225	0.664261
			149	0.656954	0.655255	0.640459	0.641059	0.664314
			150	0.657519	0.656218	0.639844	0.641656	0.664016
			151	0.656259	0.655946	0.640444	0.64112	0.663861
			152	0.657656	0.657039	0.640374	0.641174	0.664646
			153	0.657126	0.657058	0.640964	0.641464	0.665405
			154	0.657932	0.657086	0.641905	0.641369	0.664029
			155	0.658357	0.658136	0.642019	0.642101	0.665599
			156	0.657858	0.656697	0.642346	0.641895	0.665296
			157	0.657953	0.657173	0.642182	0.641921	0.66588
			158	0.657954	0.658067	0.641706	0.642425	0.664768
			159	0.658123	0.657921	0.642667	0.641636	0.665551
			160	0.658929	0.657393	0.642248	0.642229	0.665387
			161	0.658604	0.658961	0.643253	0.642909	0.665614
			162	0.65857	0.658256	0.64243	0.643278	0.665205
			163	0.659401	0.658398	0.64308	0.642118	0.665561
			164	0.658817	0.658091	0.644009	0.64241	0.66624
			165	0.659686	0.658641	0.643694	0.643328	0.666331
			166	0.659404	0.658779	0.644426	0.643346	0.667307
			167	0.658836	0.658779	0.643964	0.642605	0.666982
			168	0.659301	0.658663	0.644781	0.642318	0.665878
			169	0.659723	0.658589	0.64453	0.642267	0.666894
			170	0.659887	0.660065	0.644947	0.643761	0.666809
			171	0.659795	0.659733	0.644507	0.643391	0.667305
			172	0.659628	0.659615	0.644747	0.643205	0.666953
			173	0.659486	0.659835	0.64591	0.643224	0.667826
			174	0.659792	0.659248	0.645563	0.643175	0.666914
			175	0.659242	0.65984	0.645985	0.644134	0.666463
			176	0.660011	0.660324	0.645645	0.64355	0.667452
			177	0.660359	0.658417	0.645478	0.643968	0.667117
			178	0.659361	0.659501	0.646466	0.643661	0.667012
			179	0.65916	0.660279	0.646435	0.643071	0.666991
			180	0.660647	0.661939	0.648374	0.644938	0.668787
			181	0.667529	0.675135	0.662602	0.648357	0.672814
			182	0.679996	0.702105	0.684247	0.6739	0.680571
			183	0.703164	0.733379	0.719732	0.720797	0.693267
			184	0.739049	0.772173	0.767262	0.764051	0.712386
			185	0.774586	0.805655	0.804906	0.800432	0.740787
			186	0.802068	0.825301	0.832026	0.825241	0.766835
			187	0.820964	0.840419	0.847472	0.845373	0.794631
			188	0.838296	0.849137	0.855743	0.858263	0.815784
			189	0.851857	0.853443	0.859753	0.865885	0.832031
			190	0.858278	0.857599	0.863717	0.870729	0.841016
			191	0.862608	0.860041	0.86496	0.873724	0.849319
			192	0.867299	0.862988	0.868687	0.878611	0.852949
			193	0.87005	0.864801	0.86933	0.881064	0.855643
			194	0.872756	0.865869	0.872054	0.882409	0.86022
			195	0.874792	0.866398	0.872533	0.884274	0.86286
			196	0.875766	0.866606	0.873492	0.884785	0.864512
			197	0.877745	0.869393	0.874966	0.884528	0.867766
			198	0.878173	0.868894	0.875752	0.885956	0.868137
			199	0.878477	0.870152	0.875088	0.886343	0.869987
			200	0.879852	0.870371	0.874396	0.887229	0.87122
			201	0.879784	0.870438	0.8772	0.888227	0.872239
			202	0.880523	0.871026	0.87763	0.887553	0.871526
			203	0.880612	0.871118	0.878387	0.889179	0.872296
			204	0.880547	0.871845	0.876368	0.88862	0.873448
			205	0.8824	0.871845	0.877729	0.889313	0.87358
			206	0.882406	0.871125	0.878226	0.88827	0.874849
			207	0.882669	0.872096	0.878839	0.889741	0.875457
			208	0.882995	0.871288	0.877947	0.890743	0.875395
			209	0.882529	0.872419	0.877606	0.89092	0.876456
			210	0.88324	0.872743	0.879579	0.889873	0.875771
			211	0.88354	0.87322	0.879516	0.891038	0.876809
			212	0.883616	0.872402	0.879782	0.891472	0.875861
			213	0.883156	0.871987	0.879287	0.891751	0.876777
			214	0.883815	0.873979	0.880321	0.891252	0.877389
			215	0.884202	0.874282	0.879593	0.892878	0.877591
			216	0.884313	0.873514	0.879126	0.89275	0.878028
			217	0.88412	0.873642	0.879549	0.891834	0.87846
			218	0.883826	0.874287	0.879218	0.893242	0.877787
			219	0.884331	0.873985	0.880625	0.893159	0.877779
			220	0.884904	0.873763	0.880445	0.893874	0.879125
			221	0.88414	0.873664	0.879348	0.893296	0.879312
			222	0.88439	0.87402	0.88032	0.892842	0.879035
			223	0.885338	0.87454	0.881011	0.894595	0.879748
			224	0.884665	0.87468	0.879213	0.89445	0.879745
			225	0.884292	0.874264	0.880638	0.893537	0.88048
			226	0.883531	0.874706	0.880413	0.894793	0.879753
			227	0.884208	0.87403	0.881336	0.894008	0.879788
			228	0.884662	0.873754	0.88124	0.894545	0.879688
			229	0.884253	0.873869	0.880049	0.895811	0.881514
			230	0.885679	0.875514	0.881273	0.894221	0.87995
			231	0.884861	0.874636	0.881623	0.894954	0.880442
			232	0.885576	0.875079	0.881421	0.896078	0.881355
			233	0.884959	0.874947	0.88011	0.895568	0.880654
			234	0.885321	0.87491	0.881659	0.896332	0.881173
			235	0.884678	0.874155	0.881384	0.893865	0.881497
			236	0.884639	0.875493	0.881313	0.896515	0.881584
			237	0.884481	0.874314	0.880956	0.895049	0.881791
			238	0.884909	0.874954	0.881605	0.896145	0.880702
			239	0.885429	0.874974	0.881158	0.894747	0.881373
			240	0.885501	0.875521	0.882004	0.8964	0.881501
