# Supplementary material for: Structure-activity relationships of mitochondria-targeted tetrapeptide pharmacological compounds
Source: eLife. 2022 Aug 1;11:e75531. doi: 10.7554/eLife.75531 (PMC9342957; doi:10.7554/eLife.75531)
Supplement: Figure 6—figure supplement 1—source data 1. [file elife-75531-fig6-figsupp1-data1.xlsx]

## Sheet: Cellular ATP
Fig 6 -	ARPE-19	Rep	Control	SPN10
figure		1	1	1.36386
supplement 1		2	1	1.89389
		3	1	1.87036
Cellular		4	1	1.51588
ATP		5	1	1.71218
		Mean	1	1.67124
		SD	0	0.228866
