# Supplementary material for: Structure-activity relationships of mitochondria-targeted tetrapeptide pharmacological compounds
Source: eLife. 2022 Aug 1;11:e75531. doi: 10.7554/eLife.75531 (PMC9342957; doi:10.7554/eLife.75531)
Supplement: Figure 6—source data 1. [file elife-75531-fig6-data1.xlsx]

## Sheet: TMRM
Fig 6B		+FBS	-FBS	-FBS	-FBS	-FBS	-FBS
TMRM/	Rep	Control	no peptide	SS-31	SS-20	SPN4	SPN10
nucleus	1	100	52.4889	63.3159	80.4612	63.1823	76.8566
	2	100	56.6971	70.4274	65.7823	64.7226	73.8341
	3	100	57.1673	72.3448	78.7471	66.648	85.6565
	Mean	100	55.4511	68.6961	74.9969	64.851	78.7824
	SD	0	2.57608	4.75694	8.02596	1.73641	6.14198

## Sheet: Cell Viability
Fig 6C		Left	Rep	Control	SS-31	SS-20	SPN4	SPN10		Right	Rep	Control	SS-31	SS-20	SPN4	SPN10
Cell		Panel	1	1	1.04116	1.02275	0.96484	1.00618		Panel	1	1	1.15038	1.35977	1.6579	1.8297
Viability		(DMEM+FBS)	2	1	1.1095	1.07033	1.06671	1.06695		(DMEM only)	2	1	1.18564	1.34669	1.51151	2.06116
			3	1	0.939583	0.947064	0.945598	0.975839			3	1	1.47914	1.49899	1.49899	1.6352
			4	1	0.976701	0.995251	0.957801	0.986562			4	1	1.46828	1.54316	1.54316	1.73807
			5	1	1.04439	1.00791	1.02961	1.0308			5	1	1.43731	1.5548	1.5548	1.7315
			6	1	0.977884	0.985108	0.979068	0.962975
			Mean	1	1.01487	1.00473	0.990605	1.00488			Mean	1	1.34415	1.46068	1.55327	1.79912
			SD	0	0.0616605	0.04108	0.0473544	0.0386279			SD	0	0.162002	0.10038	0.0627341	0.161841

## Sheet: Cellular ATP
Fig 6D	Rep	Control	SS-31	SS-20	SPN4	SPN10
Cellular	1	1	1.15038	1.35977	1.19136	1.8297
ATP	2	1	1.18564	1.34669	1.18614	2.06116
	3	1	1.35618	1.47914	1.49899	1.6352
	4	1	1.36898	1.46828	1.54316	1.73807
	5	1	1.3192	1.43731	1.5548	1.7315
	Mean	1	1.27608	1.41824	1.39489	1.79912
	SD	0	0.101099	0.0614709	0.189333	0.161841
